# Supplementary material
Source: Royal Society of Chemistry journal article supplement (doi:10.1039/d6np00027d)
Supplement: d6np00027d2.xlsx [file d6np00027d2.xlsx]

## Sheet: country_genus_data
Table S1. The global geographical distribution of orchids.
Countrycode	Country name	Genus	Genus count	Total count	Genus percent	Genus group
GB	United Kingdom	Dactylorhiza	71855	154382	46.5436	Dactylorhiza
FI	Finland	Dactylorhiza	16659	39394	42.2882	Dactylorhiza
NL	Netherlands	Dactylorhiza	9286	23021	40.3371	Dactylorhiza
ES	Spain	Ophrys	10986	33728	32.5723	Ophrys
NO	Norway	Dactylorhiza	27360	84098	32.5335	Dactylorhiza
ZA	South Africa	Disa	10500	36082	29.1004	Disa
GP	Guadeloupe	Epidendrum	7143	24623	29.0095	Epidendrum
MG	Madagascar	Bulbophyllum	5340	19336	27.6169	Bulbophyllum
CO	Colombia	Dimerandra	124196	494671	25.1068	Dimerandra
NL	Netherlands	Epipactis	5681	23021	24.6775	Epipactis
RU	Russia	Dactylorhiza	9366	38594	24.268	Dactylorhiza
SE	Sweden	Dactylorhiza	79500	329857	24.1014	Dactylorhiza
EE	Estonia	Dactylorhiza	8634	35969	24.004	Dactylorhiza
AU	Australia	Caladenia	46564	195238	23.8499	Caladenia
IT	Italy	Ophrys	7401	32584	22.7136	Ophrys
SE	Sweden	Goodyera	73532	329857	22.2921	Goodyera
MG	Madagascar	Angraecum	4267	19336	22.0676	Angraecum
CA	Canada	Cypripedium	12474	57799	21.5817	Cypripedium
EE	Estonia	Epipactis	7638	35969	21.235	Epipactis
ZA	South Africa	Satyrium	7528	36082	20.8636	Satyrium
CA	Canada	Platanthera	11663	57799	20.1785	Platanthera
CH	Switzerland	Dactylorhiza	28710	143131	20.0585	Dactylorhiza
DE	Germany	Dactylorhiza	27755	140149	19.8039	Dactylorhiza
AT	Austria	Dactylorhiza	8743	45728	19.1196	Dactylorhiza
CO	Colombia	Encyclia	94223	494671	19.0476	Encyclia
NZ	New Zealand	Earina	6401	35937	17.8117	Earina
NZ	New Zealand	Pterostylis	6213	35937	17.2886	Pterostylis
AU	Australia	Pterostylis	33090	195238	16.9485	Pterostylis
DE	Germany	Epipactis	23722	140149	16.9263	Epipactis
NZ	New Zealand	Corybas	6005	35937	16.7098	Corybas
EE	Estonia	Neottia	5876	35969	16.3363	Neottia
FR	France	Ophrys	176943	1090089	16.232	Ophrys
EC	Ecuador	Epidendrum	3363	20798	16.1698	Epidendrum
IT	Italy	Anacamptis	5021	32584	15.4094	Anacamptis
CO	Colombia	Cattleya	74989	494671	15.1594	Cattleya
US	United States	Cypripedium	24253	161921	14.9783	Cypripedium
AT	Austria	Neottia	6840	45728	14.958	Neottia
AT	Austria	Epipactis	6837	45728	14.9515	Epipactis
US	United States	Platanthera	24149	161921	14.9141	Platanthera
IT	Italy	Orchis	4835	32584	14.8386	Orchis
FR	France	Orchis	158845	1090089	14.5717	Orchis
EE	Estonia	Platanthera	4979	35969	13.8425	Platanthera
ES	Spain	Orchis	4616	33728	13.686	Orchis
RU	Russia	Cypripedium	5174	38594	13.4062	Cypripedium
ES	Spain	Anacamptis	4477	33728	13.2738	Anacamptis
CH	Switzerland	Gymnadenia	18705	143131	13.0684	Gymnadenia
CA	Canada	Goodyera	7377	57799	12.7632	Goodyera
EC	Ecuador	Pleurothallis	2632	20798	12.6551	Pleurothallis
EC	Ecuador	Stelis	2566	20798	12.3377	Stelis
US	United States	Goodyera	19599	161921	12.1041	Goodyera
RU	Russia	Platanthera	4644	38594	12.033	Platanthera
RU	Russia	Epipactis	4573	38594	11.849	Epipactis
DE	Germany	Neottia	16099	140149	11.4871	Neottia
NO	Norway	Epipactis	9569	84098	11.3784	Epipactis
BR	Brazil	Epidendrum	3232	28787	11.2273	Epidendrum
AT	Austria	Gymnadenia	5019	45728	10.9758	Gymnadenia
SE	Sweden	Neottia	35945	329857	10.8971	Neottia
NO	Norway	Neottia	8869	84098	10.546	Neottia
CH	Switzerland	Epipactis	15074	143131	10.5316	Epipactis
AU	Australia	Diuris	20539	195238	10.52	Diuris
CA	Canada	Corallorhiza	6007	57799	10.3929	Corallorhiza
DE	Germany	Gymnadenia	14501	140149	10.3468	Gymnadenia
CO	Colombia	Epidendrum	50843	494671	10.2781	Epidendrum
GP	Guadeloupe	Maxillaria	2517	24623	10.2222	Maxillaria
CH	Switzerland	Neottia	14545	143131	10.162	Neottia
ZA	South Africa	Eulophia	3654	36082	10.1269	Eulophia
FR	France	Anacamptis	109297	1090089	10.0264	Anacamptis
CH	Switzerland	Orchis	14277	143131	9.97478	Orchis
NO	Norway	Gymnadenia	8346	84098	9.92414	Gymnadenia
AT	Austria	Cephalanthera	4527	45728	9.89984	Cephalanthera
GB	United Kingdom	Neottia	15180	154382	9.83275	Neottia
CN	China	Calanthe	4771	48939	9.74887	Calanthe
SE	Sweden	Platanthera	31700	329857	9.61023	Platanthera
NO	Norway	Platanthera	7899	84098	9.39261	Platanthera
DE	Germany	Orchis	13071	140149	9.3265	Orchis
US	United States	Spiranthes	14911	161921	9.20881	Spiranthes
FI	Finland	Platanthera	3620	39394	9.18922	Platanthera
NZ	New Zealand	Thelymitra	3239	35937	9.01299	Thelymitra
CA	Canada	Epipactis	5141	57799	8.89462	Epipactis
FI	Finland	Calypso	3439	39394	8.72976	Calypso
FR	France	Dactylorhiza	94291	1090089	8.64984	Dactylorhiza
BR	Brazil	Habenaria	2475	28787	8.59763	Habenaria
MX	Mexico	Epidendrum	3023	35600	8.49157	Epidendrum
EC	Ecuador	Maxillaria	1752	20798	8.42389	Maxillaria
FR	France	Neottia	91596	1090089	8.40262	Neottia
IT	Italy	Dactylorhiza	2736	32584	8.39676	Dactylorhiza
AU	Australia	Thelymitra	16317	195238	8.35749	Thelymitra
MG	Madagascar	Jumellea	1606	19336	8.30575	Jumellea
RU	Russia	Neottia	3170	38594	8.21371	Neottia
US	United States	Corallorhiza	13021	161921	8.04158	Corallorhiza
FI	Finland	Neottia	3155	39394	8.00883	Neottia
SE	Sweden	Epipactis	26183	329857	7.93768	Epipactis
FI	Finland	Cypripedium	3101	39394	7.87176	Cypripedium
GB	United Kingdom	Anacamptis	12152	154382	7.87138	Anacamptis
ES	Spain	Dactylorhiza	2593	33728	7.68797	Dactylorhiza
GB	United Kingdom	Orchis	11737	154382	7.60257	Orchis
CO	Colombia	Maxillaria	37209	494671	7.52197	Maxillaria
GP	Guadeloupe	Jacquiniella	1815	24623	7.37116	Jacquiniella
FR	France	Himantoglossum	80091	1090089	7.3472	Other
FR	France	Epipactis	79096	1090089	7.25592	Other
MX	Mexico	Prosthechea	2579	35600	7.24438	Prosthechea
GP	Guadeloupe	Octomeria	1782	24623	7.23714	Octomeria
DE	Germany	Cephalanthera	9862	140149	7.0368	Other
MG	Madagascar	Aeranthes	1341	19336	6.93525	Aeranthes
ZA	South Africa	Holothrix	2476	36082	6.86215	Holothrix
ZA	South Africa	Pterygodium	2471	36082	6.84829	Pterygodium
US	United States	Tipularia	11002	161921	6.79467	Other
DE	Germany	Platanthera	9455	140149	6.74639	Other
NL	Netherlands	Ophrys	1546	23021	6.71561	Ophrys
EE	Estonia	Orchis	2402	35969	6.67797	Orchis
CN	China	Liparis	3264	48939	6.66953	Liparis
NL	Netherlands	Anacamptis	1533	23021	6.65914	Anacamptis
EE	Estonia	Gymnadenia	2380	35969	6.61681	Other
CA	Canada	Calypso	3804	57799	6.58143	Other
NZ	New Zealand	Dendrobium	2310	35937	6.42792	Dendrobium
US	United States	Epipactis	10291	161921	6.35557	Other
AT	Austria	Orchis	2827	45728	6.18221	Other
CH	Switzerland	Cephalanthera	8782	143131	6.13564	Other
GP	Guadeloupe	Stelis	1486	24623	6.03501	Stelis
CH	Switzerland	Anacamptis	8481	143131	5.92534	Other
RU	Russia	Hemipilia	2279	38594	5.90506	Other
BR	Brazil	Gomesa	1681	28787	5.83944	Gomesa
ES	Spain	Serapias	1967	33728	5.83195	Serapias
MG	Madagascar	Cynorkis	1127	19336	5.82851	Cynorkis
FR	France	Cephalanthera	63462	1090089	5.82173	Other
NL	Netherlands	Neottia	1335	23021	5.79905	Neottia
ES	Spain	Himantoglossum	1933	33728	5.73114	Other
FI	Finland	Goodyera	2236	39394	5.67599	Other
ZA	South Africa	Disperis	2035	36082	5.63993	Other
GB	United Kingdom	Ophrys	8581	154382	5.55829	Ophrys
IT	Italy	Gymnadenia	1791	32584	5.49656	Gymnadenia
CA	Canada	Spiranthes	3164	57799	5.47414	Other
CO	Colombia	Prosthechea	27007	494671	5.45959	Other
GB	United Kingdom	Platanthera	8243	154382	5.33935	Other
IT	Italy	Neotinea	1728	32584	5.30322	Other
CO	Colombia	Eulophia	26159	494671	5.28816	Other
FR	France	Gymnadenia	57626	1090089	5.28636	Other
MX	Mexico	Bletia	1881	35600	5.28371	Bletia
IT	Italy	Cephalanthera	1681	32584	5.15897	Other
IT	Italy	Serapias	1681	32584	5.15897	Other
CN	China	Spiranthes	2479	48939	5.06549	Spiranthes
EC	Ecuador	Lepanthes	1053	20798	5.06299	Lepanthes
GB	United Kingdom	Gymnadenia	7599	154382	4.92221	Other
SE	Sweden	Gymnadenia	16231	329857	4.92062	Other
DE	Germany	Ophrys	6829	140149	4.87267	Other
CN	China	Herminium	2382	48939	4.86728	Herminium
MX	Mexico	Maxillaria	1729	35600	4.85674	Maxillaria
NZ	New Zealand	Microtis	1740	35937	4.84181	Other
CH	Switzerland	Platanthera	6913	143131	4.82984	Other
CN	China	Platanthera	2329	48939	4.75899	Platanthera
MG	Madagascar	Aerangis	920	19336	4.75796	Other
CN	China	Hemipilia	2301	48939	4.70177	Other
FR	France	Platanthera	50400	1090089	4.62348	Other
NO	Norway	Goodyera	3879	84098	4.61248	Other
EC	Ecuador	Elleanthus	958	20798	4.60621	Other
FI	Finland	Gymnadenia	1797	39394	4.56161	Other
NO	Norway	Orchis	3721	84098	4.4246	Other
CN	China	Habenaria	2150	48939	4.39322	Other
GB	United Kingdom	Epipactis	6738	154382	4.3645	Other
CN	China	Goodyera	2124	48939	4.3401	Other
MX	Mexico	Dichromanthus	1543	35600	4.33427	Dichromanthus
AT	Austria	Platanthera	1976	45728	4.3212	Other
RU	Russia	Orchis	1638	38594	4.24418	Other
NZ	New Zealand	Caladenia	1522	35937	4.23519	Other
CN	China	Coelogyne	2045	48939	4.17867	Other
ES	Spain	Cephalanthera	1409	33728	4.17754	Other
BR	Brazil	Cattleya	1198	28787	4.1616	Cattleya
BR	Brazil	Maxillaria	1195	28787	4.15118	Maxillaria
CH	Switzerland	Ophrys	5889	143131	4.11441	Other
NZ	New Zealand	Chiloglottis	1460	35937	4.06267	Other
IT	Italy	Neottia	1298	32584	3.98355	Other
IT	Italy	Himantoglossum	1288	32584	3.95286	Other
NO	Norway	Corallorhiza	3299	84098	3.9228	Other
BR	Brazil	Acianthera	1124	28787	3.90454	Other
CN	China	Bulbophyllum	1886	48939	3.85378	Other
MX	Mexico	Habenaria	1370	35600	3.84831	Other
MG	Madagascar	Polystachya	740	19336	3.82706	Other
RU	Russia	Goodyera	1431	38594	3.70783	Other
NO	Norway	Pseudorchis	3062	84098	3.64099	Other
MX	Mexico	Malaxis	1291	35600	3.6264	Other
EC	Ecuador	Cyrtochilum	753	20798	3.62054	Other
GP	Guadeloupe	Microchilus	890	24623	3.61451	Other
CA	Canada	Neottia	2089	57799	3.61425	Other
NL	Netherlands	Orchis	830	23021	3.6054	Other
EE	Estonia	Goodyera	1289	35969	3.58364	Other
AU	Australia	Prasophyllum	6884	195238	3.52595	Prasophyllum
GP	Guadeloupe	Isochilus	860	24623	3.49267	Other
US	United States	Calypso	5609	161921	3.46403	Other
AT	Austria	Anacamptis	1582	45728	3.45959	Other
DE	Germany	Anacamptis	4827	140149	3.44419	Other
RU	Russia	Gymnadenia	1325	38594	3.43318	Other
ES	Spain	Neotinea	1157	33728	3.43038	Other
BR	Brazil	Cyrtopodium	983	28787	3.41474	Other
MX	Mexico	Oncidium	1192	35600	3.34831	Other
ZA	South Africa	Corycium	1204	36082	3.33684	Other
MG	Madagascar	Eulophia	644	19336	3.33058	Other
SE	Sweden	Cypripedium	10943	329857	3.3175	Other
AU	Australia	Dipodium	6476	195238	3.31698	Other
AU	Australia	Dendrobium	6453	195238	3.3052	Other
FI	Finland	Epipactis	1299	39394	3.29746	Other
GP	Guadeloupe	Prescottia	803	24623	3.26118	Other
CN	China	Dendrobium	1566	48939	3.1999	Other
EC	Ecuador	Oncidium	664	20798	3.19261	Other
MX	Mexico	Trichocentrum	1112	35600	3.1236	Other
ZA	South Africa	Habenaria	1088	36082	3.01535	Other
ES	Spain	Epipactis	1016	33728	3.01233	Other
SE	Sweden	Orchis	9931	329857	3.0107	Other
MX	Mexico	Encyclia	1065	35600	2.99157	Other
NL	Netherlands	Platanthera	679	23021	2.94948	Other
FI	Finland	Hammarbya	1156	39394	2.93446	Other
EC	Ecuador	Sobralia	597	20798	2.87047	Other
SE	Sweden	Corallorhiza	9435	329857	2.86033	Other
NZ	New Zealand	Acianthus	1020	35937	2.8383	Other
EC	Ecuador	Masdevallia	586	20798	2.81758	Other
US	United States	Galearis	4525	161921	2.79457	Other
FI	Finland	Corallorhiza	1097	39394	2.78469	Other
GP	Guadeloupe	Pleurothallis	685	24623	2.78195	Other
CN	China	Epipactis	1349	48939	2.75649	Other
CN	China	Bletilla	1341	48939	2.74015	Other
FR	France	Serapias	29840	1090089	2.73739	Other
AT	Austria	Ophrys	1250	45728	2.73355	Other
NZ	New Zealand	Drymoanthus	980	35937	2.72699	Other
MX	Mexico	Govenia	961	35600	2.69944	Other
US	United States	Calopogon	4352	161921	2.68773	Other
IT	Italy	Epipactis	875	32584	2.68537	Other
GP	Guadeloupe	Spathoglottis	659	24623	2.67636	Other
NZ	New Zealand	Aporostylis	939	35937	2.61291	Other
MX	Mexico	Stelis	925	35600	2.59831	Other
AT	Austria	Neotinea	1185	45728	2.59141	Other
AU	Australia	Acianthus	5059	195238	2.5912	Other
US	United States	Aplectrum	4174	161921	2.5778	Other
MG	Madagascar	Liparis	488	19336	2.52379	Other
NZ	New Zealand	Prasophyllum	900	35937	2.50438	Other
AU	Australia	Microtis	4852	195238	2.48517	Other
CN	China	Cymbidium	1203	48939	2.45816	Other
AU	Australia	Corybas	4781	195238	2.44881	Other
BR	Brazil	Stelis	696	28787	2.41776	Other
MX	Mexico	Laelia	847	35600	2.37921	Other
DE	Germany	Himantoglossum	3329	140149	2.37533	Other
BR	Brazil	Octomeria	679	28787	2.3587	Other
FR	France	Neotinea	25670	1090089	2.35485	Other
FI	Finland	Epipogium	926	39394	2.35061	Other
CH	Switzerland	Pseudorchis	3348	143131	2.33912	Other
BR	Brazil	Eulophia	666	28787	2.31354	Other
NZ	New Zealand	Gastrodia	827	35937	2.30125	Other
AT	Austria	Pseudorchis	1052	45728	2.30056	Other
AU	Australia	Cryptostylis	4482	195238	2.29566	Other
BR	Brazil	Vanilla	660	28787	2.2927	Other
ZA	South Africa	Bonatea	826	36082	2.28923	Other
ES	Spain	Spiranthes	772	33728	2.2889	Other
AU	Australia	Chiloglottis	4439	195238	2.27364	Other
CA	Canada	Galearis	1312	57799	2.26994	Other
DE	Germany	Neotinea	3172	140149	2.26331	Other
NO	Norway	Cypripedium	1895	84098	2.25332	Other
AT	Austria	Cypripedium	1016	45728	2.22183	Other
MX	Mexico	Rhynchostele	788	35600	2.21348	Other
BR	Brazil	Prosthechea	622	28787	2.1607	Other
CO	Colombia	Caularthron	10544	494671	2.13152	Other
CN	China	Cypripedium	1026	48939	2.09649	Other
NL	Netherlands	Liparis	480	23021	2.08505	Other
SE	Sweden	Liparis	6854	329857	2.07787	Other
IT	Italy	Platanthera	673	32584	2.06543	Other
CA	Canada	Pogonia	1173	57799	2.02945	Other
CH	Switzerland	Neotinea	2875	143131	2.00865	Other
US	United States	Neottia	3194	161921	1.97257	Other
CO	Colombia	Catasetum	9681	494671	1.95706	Other
CH	Switzerland	Traunsteinera	2790	143131	1.94926	Other
ES	Spain	Limodorum	655	33728	1.94201	Other
GP	Guadeloupe	Polystachya	471	24623	1.91285	Other
AU	Australia	Calochilus	3722	195238	1.90639	Other
GP	Guadeloupe	Scaphyglottis	466	24623	1.89254	Other
AU	Australia	Genoplesium	3689	195238	1.88949	Other
CH	Switzerland	Himantoglossum	2698	143131	1.88499	Other
ES	Spain	Platanthera	604	33728	1.7908	Other
MG	Madagascar	Oeonia	346	19336	1.78941	Other
NL	Netherlands	Gymnadenia	410	23021	1.78098	Other
GB	United Kingdom	Goodyera	2746	154382	1.7787	Other
BR	Brazil	Polystachya	511	28787	1.77511	Other
NZ	New Zealand	Bulbophyllum	634	35937	1.7642	Other
ES	Spain	Gymnadenia	592	33728	1.75522	Other
BR	Brazil	Prescottia	496	28787	1.723	Other
MG	Madagascar	Calanthe	333	19336	1.72218	Other
GB	United Kingdom	Spiranthes	2653	154382	1.71846	Other
FR	France	Limodorum	18625	1090089	1.70858	Other
CA	Canada	Calopogon	984	57799	1.70245	Other
BR	Brazil	Catasetum	488	28787	1.69521	Other
CH	Switzerland	Cypripedium	2417	143131	1.68866	Other
CO	Colombia	Trichocentrum	8158	494671	1.64918	Other
IT	Italy	Limodorum	527	32584	1.61736	Other
RU	Russia	Malaxis	614	38594	1.59092	Other
SE	Sweden	Cephalanthera	5246	329857	1.59039	Other
NO	Norway	Ophrys	1333	84098	1.58506	Other
BR	Brazil	Encyclia	456	28787	1.58405	Other
NO	Norway	Chamorchis	1331	84098	1.58268	Other
GP	Guadeloupe	Ponthieva	389	24623	1.57982	Other
RU	Russia	Corallorhiza	603	38594	1.56242	Other
BR	Brazil	Pabstiella	447	28787	1.55278	Other
MX	Mexico	Dichaea	543	35600	1.52528	Other
NO	Norway	Cephalanthera	1280	84098	1.52203	Other
US	United States	Pogonia	2456	161921	1.51679	Other
EE	Estonia	Cypripedium	535	35969	1.48739	Other
CO	Colombia	Notylia	7306	494671	1.47694	Other
BR	Brazil	Campylocentrum	424	28787	1.47289	Other
ES	Spain	Neottia	490	33728	1.4528	Other
GP	Guadeloupe	Eulophia	357	24623	1.44986	Other
BR	Brazil	Epistephium	417	28787	1.44857	Other
MX	Mexico	Isochilus	510	35600	1.43258	Other
CA	Canada	Dactylorhiza	826	57799	1.42909	Other
GP	Guadeloupe	Aspidogyne	346	24623	1.40519	Other
FR	France	Spiranthes	15275	1090089	1.40126	Other
ZA	South Africa	Ceratandra	504	36082	1.39682	Other
GP	Guadeloupe	Malaxis	342	24623	1.38895	Other
CH	Switzerland	Spiranthes	1971	143131	1.37706	Other
AU	Australia	Eriochilus	2674	195238	1.36961	Other
RU	Russia	Calypso	526	38594	1.36291	Other
MX	Mexico	Sobralia	485	35600	1.36236	Other
MG	Madagascar	Microcoelia	262	19336	1.35499	Other
RU	Russia	Cephalanthera	521	38594	1.34995	Other
CN	China	Malaxis	660	48939	1.34862	Other
BR	Brazil	Cleistes	387	28787	1.34436	Other
US	United States	Liparis	2161	161921	1.3346	Other
GP	Guadeloupe	Dichaea	324	24623	1.31584	Other
BR	Brazil	Sacoila	376	28787	1.30615	Other
CN	China	Zeuxine	632	48939	1.2914	Other
BR	Brazil	Bulbophyllum	371	28787	1.28878	Other
CN	China	Cephalanthera	625	48939	1.2771	Other
BR	Brazil	Zygopetalum	365	28787	1.26793	Other
CN	China	Dactylorhiza	620	48939	1.26688	Other
NL	Netherlands	Himantoglossum	291	23021	1.26406	Other
AU	Australia	Pyrorchis	2455	195238	1.25744	Other
NL	Netherlands	Goodyera	285	23021	1.238	Other
EC	Ecuador	Habenaria	257	20798	1.2357	Other
AU	Australia	Cymbidium	2394	195238	1.2262	Other
EE	Estonia	Ophrys	438	35969	1.21772	Other
SE	Sweden	Herminium	3989	329857	1.20931	Other
NZ	New Zealand	Orthoceras	430	35937	1.19654	Other
DE	Germany	Cypripedium	1668	140149	1.19016	Other
NZ	New Zealand	Adenochilus	426	35937	1.18541	Other
US	United States	Eulophia	1908	161921	1.17835	Other
MX	Mexico	Myrmecophila	419	35600	1.17697	Other
BR	Brazil	Trichocentrum	337	28787	1.17067	Other
FI	Finland	Malaxis	461	39394	1.17023	Other
AU	Australia	Caleana	2247	195238	1.1509	Other
SE	Sweden	Ophrys	3794	329857	1.1502	Other
BR	Brazil	Scaphyglottis	331	28787	1.14982	Other
ZA	South Africa	Polystachya	411	36082	1.13907	Other
MX	Mexico	Barkeria	405	35600	1.13764	Other
CA	Canada	Arethusa	656	57799	1.13497	Other
BR	Brazil	Dichaea	325	28787	1.12898	Other
SE	Sweden	Calypso	3713	329857	1.12564	Other
BR	Brazil	Galeandra	324	28787	1.12551	Other
US	United States	Habenaria	1817	161921	1.12215	Other
RU	Russia	Epipogium	430	38594	1.11416	Other
NL	Netherlands	Spiranthes	256	23021	1.11203	Other
MX	Mexico	Nidema	390	35600	1.09551	Other
MX	Mexico	Eulophia	389	35600	1.0927	Other
AT	Austria	Traunsteinera	499	45728	1.09124	Other
CN	China	Satyrium	532	48939	1.08707	Other
GP	Guadeloupe	Vanilla	266	24623	1.08029	Other
AT	Austria	Himantoglossum	493	45728	1.07811	Other
SE	Sweden	Anacamptis	3450	329857	1.04591	Other
EE	Estonia	Hammarbya	376	35969	1.04534	Other
MX	Mexico	Catasetum	372	35600	1.04494	Other
RU	Russia	Anacamptis	403	38594	1.0442	Other
GB	United Kingdom	Cephalanthera	1612	154382	1.04416	Other
GP	Guadeloupe	Cyclopogon	255	24623	1.03562	Other
MG	Madagascar	Habenaria	200	19336	1.03434	Other
CN	China	Neottia	503	48939	1.02781	Other
EC	Ecuador	Cranichis	213	20798	1.02414	Other
GB	United Kingdom	Pseudorchis	1579	154382	1.02279	Other
EC	Ecuador	Fernandezia	212	20798	1.01933	Other
CN	China	Gymnadenia	492	48939	1.00533	Other
CN	China	Pleione	489	48939	0.999203	Other
MX	Mexico	Corallorhiza	350	35600	0.983146	Other
GP	Guadeloupe	Muscarella	242	24623	0.982821	Other
EE	Estonia	Liparis	348	35969	0.9675	Other
CN	China	Arundina	472	48939	0.964466	Other
MX	Mexico	Pleurothallis	342	35600	0.960674	Other
BR	Brazil	Pseudolaelia	275	28787	0.955292	Other
AU	Australia	Cyrtostylis	1865	195238	0.955244	Other
MX	Mexico	Specklinia	339	35600	0.952247	Other
GP	Guadeloupe	Cranichis	234	24623	0.950331	Other
MX	Mexico	Scaphyglottis	338	35600	0.949438	Other
BR	Brazil	Anathallis	273	28787	0.948345	Other
GB	United Kingdom	Hammarbya	1455	154382	0.942467	Other
CN	China	Gastrochilus	459	48939	0.937902	Other
EC	Ecuador	Prosthechea	195	20798	0.93759	Other
CN	China	Eria	455	48939	0.929729	Other
BR	Brazil	Cyclopogon	267	28787	0.927502	Other
AT	Austria	Corallorhiza	419	45728	0.916288	Other
EE	Estonia	Herminium	328	35969	0.911896	Other
US	United States	Epidendrum	1470	161921	0.90785	Other
CN	China	Pinalia	444	48939	0.907252	Other
GP	Guadeloupe	Oncidium	223	24623	0.905657	Other
ZA	South Africa	Evotella	326	36082	0.903498	Other
MX	Mexico	Guarianthe	320	35600	0.898876	Other
ZA	South Africa	Mystacidium	323	36082	0.895183	Other
EC	Ecuador	Scaphyglottis	186	20798	0.894317	Other
CN	China	Cleisostoma	436	48939	0.890905	Other
EC	Ecuador	Dichaea	185	20798	0.889509	Other
MX	Mexico	Sarcoglottis	316	35600	0.88764	Other
ZA	South Africa	Schizochilus	317	36082	0.878554	Other
RU	Russia	Spiranthes	339	38594	0.878375	Other
EC	Ecuador	Trichosalpinx	180	20798	0.865468	Other
CN	China	Oberonia	416	48939	0.850038	Other
IT	Italy	Traunsteinera	276	32584	0.847041	Other
AU	Australia	Pheladenia	1652	195238	0.846147	Other
IT	Italy	Pseudorchis	275	32584	0.843973	Other
GP	Guadeloupe	Psilochilus	207	24623	0.840677	Other
MX	Mexico	Sacoila	297	35600	0.83427	Other
EC	Ecuador	Gomphichis	172	20798	0.827003	Other
EC	Ecuador	Ponthieva	171	20798	0.822194	Other
MX	Mexico	Cyrtopodium	289	35600	0.811798	Other
BR	Brazil	Liparis	233	28787	0.809393	Other
RU	Russia	Herminium	311	38594	0.805825	Other
MX	Mexico	Brassavola	285	35600	0.800562	Other
BR	Brazil	Sobralia	230	28787	0.798972	Other
NO	Norway	Anacamptis	671	84098	0.797879	Other
CH	Switzerland	Corallorhiza	1141	143131	0.797172	Other
CA	Canada	Liparis	460	57799	0.795862	Other
BR	Brazil	Brassavola	229	28787	0.795498	Other
CN	China	Eulophia	388	48939	0.792824	Other
SE	Sweden	Hammarbya	2571	329857	0.779429	Other
MG	Madagascar	Vanilla	150	19336	0.775755	Other
MX	Mexico	Ponthieva	276	35600	0.775281	Other
CH	Switzerland	Goodyera	1104	143131	0.771321	Other
MG	Madagascar	Oberonia	148	19336	0.765412	Other
US	United States	Encyclia	1233	161921	0.761482	Other
SE	Sweden	Neotinea	2511	329857	0.761239	Other
BR	Brazil	Rodriguezia	218	28787	0.757286	Other
BR	Brazil	Sarcoglottis	218	28787	0.757286	Other
ZA	South Africa	Stenoglottis	273	36082	0.75661	Other
MX	Mexico	Lycaste	266	35600	0.747191	Other
AU	Australia	Disa	1434	195238	0.734488	Other
MX	Mexico	Jacquiniella	259	35600	0.727528	Other
MX	Mexico	Stanhopea	258	35600	0.724719	Other
MG	Madagascar	Cryptopus	140	19336	0.724038	Other
GP	Guadeloupe	Tetramicra	178	24623	0.722901	Other
CN	China	Odontochilus	352	48939	0.719263	Other
ZA	South Africa	Cyrtorchis	259	36082	0.717809	Other
MX	Mexico	Aulosepalum	255	35600	0.716292	Other
GP	Guadeloupe	Tolumnia	176	24623	0.714779	Other
FR	France	Goodyera	7783	1090089	0.713978	Other
FR	France	Cypripedium	7749	1090089	0.710859	Other
DE	Germany	Traunsteinera	990	140149	0.706391	Other
AT	Austria	Chamorchis	323	45728	0.706351	Other
AT	Austria	Malaxis	322	45728	0.704164	Other
NL	Netherlands	Cephalanthera	162	23021	0.703705	Other
CH	Switzerland	Limodorum	1002	143131	0.700058	Other
MG	Madagascar	Benthamia	135	19336	0.69818	Other
BR	Brazil	Bifrenaria	200	28787	0.694758	Other
ZA	South Africa	Liparis	250	36082	0.692866	Other
CN	China	Peristylus	335	48939	0.684526	Other
NZ	New Zealand	Cyrtostylis	244	35937	0.678966	Other
MX	Mexico	Notylia	241	35600	0.676966	Other
BR	Brazil	Aspidogyne	194	28787	0.673915	Other
RU	Russia	Neotinea	256	38594	0.663316	Other
CA	Canada	Malaxis	383	57799	0.662641	Other
NO	Norway	Hammarbya	554	84098	0.658755	Other
MX	Mexico	Elleanthus	234	35600	0.657303	Other
MG	Madagascar	Neobathiea	127	19336	0.656806	Other
EC	Ecuador	Platystele	136	20798	0.653909	Other
CN	China	Oreorchis	320	48939	0.653875	Other
MG	Madagascar	Disperis	126	19336	0.651634	Other
CN	China	Tainia	318	48939	0.649789	Other
AU	Australia	Sarcochilus	1258	195238	0.644342	Other
MX	Mexico	Deiregyne	229	35600	0.643258	Other
FR	France	Traunsteinera	7011	1090089	0.643158	Other
GP	Guadeloupe	Elleanthus	157	24623	0.637615	Other
BR	Brazil	Pleurothallis	183	28787	0.635704	Other
EC	Ecuador	Dracula	132	20798	0.634676	Other
MX	Mexico	Polystachya	224	35600	0.629213	Other
BR	Brazil	Phymatidium	180	28787	0.625282	Other
NZ	New Zealand	Waireia	223	35937	0.62053	Other
EC	Ecuador	Altensteinia	129	20798	0.620252	Other
GB	United Kingdom	Corallorhiza	955	154382	0.618595	Other
MX	Mexico	Gongora	220	35600	0.617978	Other
BR	Brazil	Pelexia	176	28787	0.611387	Other
EC	Ecuador	Myoxanthus	127	20798	0.610636	Other
US	United States	Malaxis	986	161921	0.608939	Other
ZA	South Africa	Ansellia	219	36082	0.606951	Other
ZA	South Africa	Brownleea	219	36082	0.606951	Other
MX	Mexico	Lepanthes	216	35600	0.606742	Other
IT	Italy	Spiranthes	197	32584	0.604591	Other
GP	Guadeloupe	Lepanthes	148	24623	0.601064	Other
NL	Netherlands	Herminium	138	23021	0.599453	Other
CN	China	Gastrodia	293	48939	0.598705	Other
US	United States	Isotria	958	161921	0.591647	Other
CN	China	Spathoglottis	288	48939	0.588488	Other
MX	Mexico	Vanilla	209	35600	0.587079	Other
CN	China	Galearis	280	48939	0.572141	Other
BR	Brazil	Miltonia	164	28787	0.569702	Other
MX	Mexico	Arpophyllum	202	35600	0.567416	Other
DE	Germany	Goodyera	789	140149	0.562972	Other
ES	Spain	Gennaria	188	33728	0.5574	Other
US	United States	Bletia	897	161921	0.553974	Other
GP	Guadeloupe	Cyrtochilum	136	24623	0.552329	Other
US	United States	Cephalanthera	892	161921	0.550886	Other
EC	Ecuador	Brassia	114	20798	0.54813	Other
CN	China	Cyrtosia	267	48939	0.545577	Other
EC	Ecuador	Telipogon	113	20798	0.543321	Other
US	United States	Arundina	878	161921	0.54224	Other
EC	Ecuador	Aa	112	20798	0.538513	Other
AU	Australia	Leporella	1050	195238	0.537805	Other
CO	Colombia	Pleurothallis	2652	494671	0.536114	Other
BR	Brazil	Malaxis	154	28787	0.534964	Other
MX	Mexico	Brassia	189	35600	0.530899	Other
DE	Germany	Pseudorchis	743	140149	0.53015	Other
CN	China	Nervilia	259	48939	0.52923	Other
NO	Norway	Herminium	441	84098	0.524388	Other
ZA	South Africa	Brachycorythis	189	36082	0.523807	Other
GP	Guadeloupe	Brachionidium	128	24623	0.519839	Other
AU	Australia	Gastrodia	1011	195238	0.51783	Other
EE	Estonia	Malaxis	185	35969	0.514332	Other
EC	Ecuador	Xylobium	105	20798	0.504856	Other
US	United States	Zeuxine	816	161921	0.503949	Other
ES	Spain	Habenaria	169	33728	0.501067	Other
BR	Brazil	Microchilus	143	28787	0.496752	Other
MX	Mexico	Erycina	176	35600	0.494382	Other
AU	Australia	Lyperanthus	949	195238	0.486073	Other
DE	Germany	Spiranthes	675	140149	0.48163	Other
MG	Madagascar	Acampe	93	19336	0.480968	Other
MX	Mexico	Liparis	171	35600	0.480337	Other
BR	Brazil	Specklinia	138	28787	0.479383	Other
AT	Austria	Spiranthes	219	45728	0.478919	Other
FI	Finland	Pseudorchis	186	39394	0.472153	Other
CN	China	Cremastra	231	48939	0.472016	Other
EC	Ecuador	Andinia	98	20798	0.471199	Other
FR	France	Pseudorchis	5114	1090089	0.469136	Other
CO	Colombia	Cyrtochilum	2319	494671	0.468796	Other
RU	Russia	Ophrys	179	38594	0.463803	Other
EC	Ecuador	Acianthera	95	20798	0.456775	Other
BR	Brazil	Isochilus	131	28787	0.455067	Other
CN	China	Thrixspermum	221	48939	0.451583	Other
EE	Estonia	Cephalanthera	162	35969	0.450388	Other
SE	Sweden	Epipogium	1474	329857	0.44686	Other
MX	Mexico	Platystele	159	35600	0.446629	Other
CO	Colombia	Elleanthus	2208	494671	0.446357	Other
MG	Madagascar	Grammangis	86	19336	0.444766	Other
BR	Brazil	Koellensteinia	128	28787	0.444645	Other
GP	Guadeloupe	Campylocentrum	109	24623	0.442676	Other
AU	Australia	Spiranthes	862	195238	0.441512	Other
BR	Brazil	Notylia	126	28787	0.437698	Other
MX	Mexico	Mesadenus	155	35600	0.435393	Other
BR	Brazil	Elleanthus	124	28787	0.43075	Other
CN	China	Tropidia	209	48939	0.427062	Other
MX	Mexico	Leochilus	152	35600	0.426966	Other
CN	China	Anoectochilus	208	48939	0.425019	Other
MX	Mexico	Ornithocephalus	151	35600	0.424157	Other
MG	Madagascar	Satyrium	82	19336	0.424079	Other
CN	China	Holcoglossum	207	48939	0.422976	Other
EC	Ecuador	Scaphosepalum	87	20798	0.418309	Other
AU	Australia	Bulbophyllum	816	195238	0.417951	Other
DE	Germany	Malaxis	585	140149	0.417413	Other
MX	Mexico	Campylocentrum	148	35600	0.41573	Other
CN	China	Luisia	203	48939	0.414802	Other
MG	Madagascar	Sobennikoffia	80	19336	0.413736	Other
US	United States	Triphora	667	161921	0.411929	Other
MX	Mexico	Goodyera	146	35600	0.410112	Other
CH	Switzerland	Chamorchis	583	143131	0.407319	Other
NZ	New Zealand	Genoplesium	146	35937	0.406267	Other
SE	Sweden	Malaxis	1336	329857	0.405024	Other
AU	Australia	Leptoceras	790	195238	0.404634	Other
CN	China	Vanda	197	48939	0.402542	Other
GP	Guadeloupe	Acianthera	99	24623	0.402063	Other
MX	Mexico	Aspidogyne	143	35600	0.401685	Other
MX	Mexico	Schiedeella	143	35600	0.401685	Other
CN	China	Epipogium	196	48939	0.400499	Other
CO	Colombia	Stelis	1979	494671	0.400064	Other
ZA	South Africa	Angraecum	144	36082	0.399091	Other
DE	Germany	Herminium	559	140149	0.398861	Other
EE	Estonia	Anacamptis	143	35969	0.397565	Other
NL	Netherlands	Hammarbya	91	23021	0.395291	Other
US	United States	Spathoglottis	640	161921	0.395254	Other
EC	Ecuador	Cyclopogon	82	20798	0.394269	Other
AT	Austria	Limodorum	179	45728	0.391445	Other
ZA	South Africa	Tridactyle	141	36082	0.390777	Other
GP	Guadeloupe	Habenaria	96	24623	0.389879	Other
EC	Ecuador	Erycina	81	20798	0.389461	Other
MX	Mexico	Coelia	138	35600	0.38764	Other
CH	Switzerland	Herminium	553	143131	0.386359	Other
DE	Germany	Corallorhiza	539	140149	0.384591	Other
BR	Brazil	Eurystyles	110	28787	0.382117	Other
CN	China	Erythrodes	187	48939	0.382108	Other
CN	China	Cheirostylis	185	48939	0.378022	Other
GP	Guadeloupe	Brassavola	93	24623	0.377696	Other
MG	Madagascar	Nervilia	73	19336	0.377534	Other
AU	Australia	Eulophia	731	195238	0.374415	Other
MX	Mexico	Cranichis	133	35600	0.373596	Other
EE	Estonia	Corallorhiza	133	35969	0.369763	Other
EC	Ecuador	Phragmipedium	76	20798	0.36542	Other
CH	Switzerland	Liparis	518	143131	0.361906	Other
BR	Brazil	Capanemia	104	28787	0.361274	Other
FI	Finland	Cephalanthera	141	39394	0.357923	Other
BR	Brazil	Mesadenella	103	28787	0.3578	Other
BR	Brazil	Oncidium	103	28787	0.3578	Other
CN	China	Phalaenopsis	175	48939	0.357588	Other
EC	Ecuador	Muscarella	74	20798	0.355803	Other
EC	Ecuador	Pterichis	74	20798	0.355803	Other
NO	Norway	Epipogium	299	84098	0.355538	Other
MG	Madagascar	Lemurella	68	19336	0.351676	Other
MX	Mexico	Cypripedium	125	35600	0.351124	Other
BR	Brazil	Promenaea	101	28787	0.350853	Other
CN	China	Crepidium	169	48939	0.345328	Other
MX	Mexico	Spiranthes	122	35600	0.342697	Other
RU	Russia	Traunsteinera	132	38594	0.342022	Other
NO	Norway	Malaxis	287	84098	0.341269	Other
MX	Mexico	Mormodes	120	35600	0.337079	Other
MX	Mexico	Platanthera	120	35600	0.337079	Other
MX	Mexico	Cyclopogon	119	35600	0.33427	Other
EC	Ecuador	Ionopsis	69	20798	0.331763	Other
MX	Mexico	Acianthera	118	35600	0.331461	Other
CO	Colombia	Laelia	1638	494671	0.331129	Other
MX	Mexico	Rhyncholaelia	116	35600	0.325843	Other
CN	China	Microtis	158	48939	0.322851	Other
AT	Austria	Goodyera	147	45728	0.321466	Other
GP	Guadeloupe	Ionopsis	79	24623	0.320838	Other
BR	Brazil	Zygostates	92	28787	0.319589	Other
US	United States	Dactylorhiza	513	161921	0.316821	Other
EC	Ecuador	Malaxis	65	20798	0.31253	Other
MX	Mexico	Clowesia	110	35600	0.308989	Other
BR	Brazil	Cranichis	88	28787	0.305694	Other
GP	Guadeloupe	Triphora	75	24623	0.304593	Other
NZ	New Zealand	Calochilus	109	35937	0.303309	Other
RU	Russia	Hammarbya	117	38594	0.303156	Other
EC	Ecuador	Liparis	63	20798	0.302914	Other
EC	Ecuador	Vanilla	63	20798	0.302914	Other
BR	Brazil	Lockhartia	87	28787	0.30222	Other
AU	Australia	Drakaea	588	195238	0.301171	Other
CO	Colombia	Oncidium	1486	494671	0.300402	Other
BR	Brazil	Eltroplectris	85	28787	0.295272	Other
MX	Mexico	Calanthe	105	35600	0.294944	Other
MX	Mexico	Nemaconia	105	35600	0.294944	Other
MG	Madagascar	Oeoniella	57	19336	0.294787	Other
US	United States	Arethusa	474	161921	0.292735	Other
BR	Brazil	Ionopsis	84	28787	0.291798	Other
FR	France	Liparis	3180	1090089	0.291719	Other
CN	China	Pogonia	142	48939	0.290157	Other
DE	Germany	Liparis	403	140149	0.287551	Other
MX	Mexico	Funkiella	102	35600	0.286517	Other
CN	China	Diploprora	140	48939	0.28607	Other
AU	Australia	Calanthe	556	195238	0.284781	Other
EC	Ecuador	Comparettia	59	20798	0.283681	Other
IT	Italy	Cypripedium	92	32584	0.282347	Other
SE	Sweden	Pseudorchis	909	329857	0.275574	Other
MG	Madagascar	Goodyera	53	19336	0.2741	Other
EC	Ecuador	Brachionidium	57	20798	0.274065	Other
US	United States	Cleistesiopsis	442	161921	0.272973	Other
CN	China	Cryptochilus	133	48939	0.271767	Other
RU	Russia	Limodorum	104	38594	0.269472	Other
EC	Ecuador	Polystachya	56	20798	0.269257	Other
GP	Guadeloupe	Leochilus	66	24623	0.268042	Other
GB	United Kingdom	Himantoglossum	410	154382	0.265575	Other
FR	France	Corallorhiza	2871	1090089	0.263373	Other
MX	Mexico	Beloglottis	93	35600	0.261236	Other
AU	Australia	Orthoceras	510	195238	0.26122	Other
BR	Brazil	Myoxanthus	75	28787	0.260534	Other
EC	Ecuador	Arundina	54	20798	0.25964	Other
EC	Ecuador	Specklinia	54	20798	0.25964	Other
MG	Madagascar	Disa	50	19336	0.258585	Other
FR	France	Chamorchis	2805	1090089	0.257318	Other
BR	Brazil	Ornithocephalus	74	28787	0.25706	Other
RU	Russia	Liparis	99	38594	0.256517	Other
GP	Guadeloupe	Pelexia	63	24623	0.255858	Other
MX	Mexico	Greenwoodiella	91	35600	0.255618	Other
EC	Ecuador	Microchilus	53	20798	0.254832	Other
AU	Australia	Plectorrhiza	492	195238	0.252	Other
CN	China	Dienia	123	48939	0.251333	Other
CN	China	Vanilla	123	48939	0.251333	Other
GB	United Kingdom	Neotinea	388	154382	0.251325	Other
EC	Ecuador	Rodriguezia	52	20798	0.250024	Other
MX	Mexico	Cuitlauzina	89	35600	0.25	Other
MX	Mexico	Dinema	89	35600	0.25	Other
CN	China	Acanthophippium	122	48939	0.24929	Other
RU	Russia	Galearis	96	38594	0.248743	Other
GP	Guadeloupe	Wullschlaegelia	61	24623	0.247736	Other
EE	Estonia	Neotinea	89	35969	0.247435	Other
MX	Mexico	Prescottia	87	35600	0.244382	Other
BR	Brazil	Skeptrostachys	70	28787	0.243165	Other
CN	China	Acampe	119	48939	0.24316	Other
EC	Ecuador	Myrosmodes	50	20798	0.240408	Other
BR	Brazil	Arundina	69	28787	0.239692	Other
CO	Colombia	Scaphyglottis	1182	494671	0.238947	Other
CH	Switzerland	Epipogium	342	143131	0.238942	Other
CN	China	Rhomboda	116	48939	0.23703	Other
AT	Austria	Liparis	108	45728	0.236179	Other
AU	Australia	Liparis	452	195238	0.231512	Other
BR	Brazil	Govenia	66	28787	0.22927	Other
GP	Guadeloupe	Sacoila	55	24623	0.223368	Other
BR	Brazil	Grandiphyllum	64	28787	0.222323	Other
MX	Mexico	Chysis	79	35600	0.22191	Other
MX	Mexico	Coenoemersa	79	35600	0.22191	Other
EC	Ecuador	Otoglossum	46	20798	0.221175	Other
US	United States	Dendrophylax	356	161921	0.21986	Other
MX	Mexico	Domingoa	78	35600	0.219101	Other
MX	Mexico	Triphora	78	35600	0.219101	Other
BR	Brazil	Barbosella	63	28787	0.218849	Other
CN	China	Collabium	106	48939	0.216596	Other
AU	Australia	Arthrochilus	422	195238	0.216146	Other
BR	Brazil	Erycina	62	28787	0.215375	Other
BR	Brazil	Jacquiniella	62	28787	0.215375	Other
DE	Germany	Chamorchis	301	140149	0.214771	Other
EC	Ecuador	Caucaea	44	20798	0.211559	Other
MX	Mexico	Restrepiella	75	35600	0.210674	Other
CN	China	Cryptostylis	103	48939	0.210466	Other
CN	China	Pholidota	102	48939	0.208423	Other
EC	Ecuador	Porroglossum	43	20798	0.206751	Other
EC	Ecuador	Stanhopea	43	20798	0.206751	Other
EC	Ecuador	Trichopilia	43	20798	0.206751	Other
MX	Mexico	Tamayorkis	73	35600	0.205056	Other
BR	Brazil	Isabelia	59	28787	0.204954	Other
BR	Brazil	Sauroglossum	59	28787	0.204954	Other
MX	Mexico	Trichosalpinx	72	35600	0.202247	Other
EC	Ecuador	Ida	41	20798	0.197134	Other
US	United States	Sacoila	318	161921	0.196392	Other
AT	Austria	Herminium	89	45728	0.194629	Other
BR	Brazil	Dimerandra	56	28787	0.194532	Other
CN	China	Appendicula	95	48939	0.194119	Other
IT	Italy	Corallorhiza	63	32584	0.193346	Other
MG	Madagascar	Graphorkis	37	19336	0.191353	Other
ZA	South Africa	Bulbophyllum	69	36082	0.191231	Other
BR	Brazil	Masdevallia	55	28787	0.191058	Other
MX	Mexico	Lockhartia	68	35600	0.191011	Other
MX	Mexico	Galeoglossum	67	35600	0.188202	Other
BR	Brazil	Corymborkis	54	28787	0.187585	Other
BR	Brazil	Paradisanthus	54	28787	0.187585	Other
GP	Guadeloupe	Trichosalpinx	46	24623	0.186817	Other
CN	China	Schoenorchis	90	48939	0.183902	Other
EC	Ecuador	Aspidogyne	38	20798	0.18271	Other
CH	Switzerland	Malaxis	261	143131	0.18235	Other
MG	Madagascar	Cheirostylis	35	19336	0.18101	Other
US	United States	Polystachya	293	161921	0.180952	Other
BR	Brazil	Laelia	52	28787	0.180637	Other
BR	Brazil	Leptotes	52	28787	0.180637	Other
ZA	South Africa	Aerangis	65	36082	0.180145	Other
CN	China	Brachycorythis	88	48939	0.179816	Other
EC	Ecuador	Govenia	37	20798	0.177902	Other
US	United States	Ponthieva	288	161921	0.177865	Other
BR	Brazil	Veyretia	51	28787	0.177163	Other
MG	Madagascar	Platylepis	34	19336	0.175838	Other
CO	Colombia	Lepanthes	867	494671	0.175268	Other
GP	Guadeloupe	Prosthechea	43	24623	0.174633	Other
ZA	South Africa	Pachites	63	36082	0.174602	Other
EC	Ecuador	Octomeria	36	20798	0.173094	Other
EC	Ecuador	Trichoceros	36	20798	0.173094	Other
IT	Italy	Goodyera	56	32584	0.171863	Other
CN	China	Anthogonium	84	48939	0.171642	Other
CO	Colombia	Masdevallia	847	494671	0.171225	Other
BR	Brazil	Cirrhaea	49	28787	0.170216	Other
ZA	South Africa	Neobolusia	61	36082	0.169059	Other
BR	Brazil	Lankesterella	48	28787	0.166742	Other
BR	Brazil	Psilochilus	48	28787	0.166742	Other
ZA	South Africa	Huttonaea	60	36082	0.166288	Other
US	United States	Prosthechea	268	161921	0.165513	Other
CN	China	Erythrorchis	81	48939	0.165512	Other
CN	China	Pelatantheria	81	48939	0.165512	Other
EC	Ecuador	Cattleya	34	20798	0.163477	Other
EC	Ecuador	Gravendeelia	34	20798	0.163477	Other
EC	Ecuador	Prescottia	34	20798	0.163477	Other
BR	Brazil	Xylobium	47	28787	0.163268	Other
AU	Australia	Erythrorchis	317	195238	0.162366	Other
GB	United Kingdom	Liparis	247	154382	0.159993	Other
BR	Brazil	Serapias	46	28787	0.159794	Other
EC	Ecuador	Anathallis	33	20798	0.158669	Other
EC	Ecuador	Lockhartia	33	20798	0.158669	Other
EC	Ecuador	Ornithocephalus	33	20798	0.158669	Other
EC	Ecuador	Porphyrostachys	33	20798	0.158669	Other
EC	Ecuador	Sertifera	33	20798	0.158669	Other
SE	Sweden	Chamorchis	523	329857	0.158554	Other
EC	Ecuador	Barbosella	32	20798	0.153861	Other
CN	China	Orchis	74	48939	0.151209	Other
CA	Canada	Cephalanthera	87	57799	0.150522	Other
BR	Brazil	Comparettia	43	28787	0.149373	Other
BR	Brazil	Grobya	43	28787	0.149373	Other
CN	China	Robiquetia	72	48939	0.147122	Other
MX	Mexico	Oestlundia	52	35600	0.146067	Other
BR	Brazil	Gongora	42	28787	0.145899	Other
MX	Mexico	Anathallis	51	35600	0.143258	Other
MX	Mexico	Pelexia	51	35600	0.143258	Other
MX	Mexico	Meiracyllium	50	35600	0.140449	Other
EC	Ecuador	Gongora	29	20798	0.139436	Other
EC	Ecuador	Lepanthopsis	29	20798	0.139436	Other
EC	Ecuador	Notylia	29	20798	0.139436	Other
EC	Ecuador	Palmorchis	29	20798	0.139436	Other
EC	Ecuador	Trisetella	29	20798	0.139436	Other
NZ	New Zealand	Spiranthes	50	35937	0.139132	Other
MX	Mexico	Cycnoches	49	35600	0.13764	Other
MX	Mexico	Homalopetalum	49	35600	0.13764	Other
MX	Mexico	Ionopsis	49	35600	0.13764	Other
BR	Brazil	Bletia	39	28787	0.135478	Other
BR	Brazil	Brassia	39	28787	0.135478	Other
MX	Mexico	Bulbophyllum	48	35600	0.134831	Other
MX	Mexico	Masdevallia	47	35600	0.132022	Other
BR	Brazil	Wullschlaegelia	38	28787	0.132004	Other
CO	Colombia	Polystachya	652	494671	0.131805	Other
EC	Ecuador	Bletia	27	20798	0.12982	Other
EC	Ecuador	Koellensteinia	27	20798	0.12982	Other
EC	Ecuador	Restrepia	27	20798	0.12982	Other
US	United States	Calanthe	209	161921	0.129075	Other
CN	China	Chrysoglossum	63	48939	0.128732	Other
CN	China	Strongyleria	63	48939	0.128732	Other
CN	China	Arachnis	62	48939	0.126688	Other
CN	China	Trichoglottis	62	48939	0.126688	Other
EC	Ecuador	Catasetum	26	20798	0.125012	Other
ZA	South Africa	Ypsilopus	45	36082	0.124716	Other
CN	China	Chiloschista	61	48939	0.124645	Other
CN	China	Corybas	61	48939	0.124645	Other
CN	China	Dendrolirium	61	48939	0.124645	Other
RU	Russia	Steveniella	48	38594	0.124372	Other
MG	Madagascar	Beclardia	24	19336	0.124121	Other
CN	China	Ceratostylis	60	48939	0.122602	Other
FI	Finland	Orchis	48	39394	0.121846	Other
MX	Mexico	Alamania	43	35600	0.120787	Other
RU	Russia	Oreorchis	46	38594	0.11919	Other
FR	France	Epipogium	1296	1090089	0.118889	Other
CN	China	Galeola	58	48939	0.118515	Other
BR	Brazil	Hapalorchis	34	28787	0.118109	Other
CO	Colombia	Dichaea	575	494671	0.116239	Other
EC	Ecuador	Campylocentrum	24	20798	0.115396	Other
EC	Ecuador	Dryadella	24	20798	0.115396	Other
EC	Ecuador	Erythrodes	24	20798	0.115396	Other
EC	Ecuador	Kefersteinia	24	20798	0.115396	Other
MX	Mexico	Artorima	41	35600	0.115169	Other
MX	Mexico	Epipactis	41	35600	0.115169	Other
BR	Brazil	Huntleya	33	28787	0.114635	Other
RU	Russia	Himantoglossum	44	38594	0.114007	Other
IT	Italy	Chamorchis	37	32584	0.113553	Other
CO	Colombia	Rodriguezia	560	494671	0.113207	Other
CN	China	Pecteilis	55	48939	0.112385	Other
MX	Mexico	Comparettia	40	35600	0.11236	Other
MX	Mexico	Rossioglossum	40	35600	0.11236	Other
AU	Australia	Habenaria	218	195238	0.111659	Other
CN	China	Paphiopedilum	54	48939	0.110341	Other
FI	Finland	Chamorchis	43	39394	0.109154	Other
NZ	New Zealand	Townsonia	39	35937	0.108523	Other
CA	Canada	Aplectrum	62	57799	0.107268	Other
BR	Brazil	Aspasia	30	28787	0.104214	Other
BR	Brazil	Pteroglossa	30	28787	0.104214	Other
MX	Mexico	Mesadenella	37	35600	0.103933	Other
ZA	South Africa	Gastrodia	37	36082	0.102544	Other
EC	Ecuador	Dimerandra	21	20798	0.100971	Other
US	United States	Vanilla	160	161921	0.0988136	Other
ES	Spain	Goodyera	33	33728	0.0978416	Other
GB	United Kingdom	Herminium	149	154382	0.0965138	Other
EC	Ecuador	Encyclia	20	20798	0.0961631	Other
CN	China	Taeniophyllum	47	48939	0.0960379	Other
MX	Mexico	Trichopilia	34	35600	0.0955056	Other
BR	Brazil	Dendrobium	27	28787	0.0937923	Other
BR	Brazil	Trichosalpinx	27	28787	0.0937923	Other
GP	Guadeloupe	Trichocentrum	23	24623	0.0934086	Other
MX	Mexico	Ponera	33	35600	0.0926966	Other
CO	Colombia	Comparettia	455	494671	0.0919803	Other
EC	Ecuador	Chondroscaphe	19	20798	0.0913549	Other
EC	Ecuador	Crossoglossa	19	20798	0.0913549	Other
BR	Brazil	Dryadella	26	28787	0.0903185	Other
BR	Brazil	Madisonia	26	28787	0.0903185	Other
DE	Germany	Hammarbya	125	140149	0.0891908	Other
ZA	South Africa	Dracomonticola	32	36082	0.0886869	Other
ZA	South Africa	Rhipidoglossum	32	36082	0.0886869	Other
CA	Canada	Pseudorchis	51	57799	0.0882368	Other
CO	Colombia	Sobralia	436	494671	0.0881394	Other
MG	Madagascar	Galeola	17	19336	0.0879189	Other
CN	China	Aphyllorchis	43	48939	0.0878645	Other
AT	Austria	Epipogium	40	45728	0.0874738	Other
EC	Ecuador	Baskervilla	18	20798	0.0865468	Other
EC	Ecuador	Vitekorchis	18	20798	0.0865468	Other
BR	Brazil	Brachystele	24	28787	0.083371	Other
BR	Brazil	Trizeuxis	24	28787	0.083371	Other
ZA	South Africa	Rangaeris	30	36082	0.0831439	Other
RU	Russia	Habenaria	32	38594	0.0829144	Other
MG	Madagascar	Tylostigma	16	19336	0.0827472	Other
EC	Ecuador	Eriopsis	17	20798	0.0817386	Other
CN	China	Corallorhiza	40	48939	0.0817344	Other
MX	Mexico	Restrepia	29	35600	0.0814607	Other
ZA	South Africa	Nervilia	29	36082	0.0803725	Other
BR	Brazil	Aganisia	23	28787	0.0798972	Other
BR	Brazil	Cyanaeorchis	23	28787	0.0798972	Other
CN	China	Agrostophyllum	39	48939	0.079691	Other
CN	China	Didymoplexis	39	48939	0.079691	Other
MX	Mexico	Kionophyton	28	35600	0.0786517	Other
MX	Mexico	Microthelys	28	35600	0.0786517	Other
CN	China	Ania	38	48939	0.0776477	Other
CN	China	Lecanorchis	38	48939	0.0776477	Other
CN	China	Papilionanthe	38	48939	0.0776477	Other
CN	China	Phreatia	38	48939	0.0776477	Other
EC	Ecuador	Laelia	16	20798	0.0769305	Other
EC	Ecuador	Monophyllorchis	16	20798	0.0769305	Other
BR	Brazil	Coryanthes	22	28787	0.0764234	Other
BR	Brazil	Houlletia	22	28787	0.0764234	Other
MX	Mexico	Corymborkis	27	35600	0.0758427	Other
MX	Mexico	Sotoa	27	35600	0.0758427	Other
EE	Estonia	Epipogium	27	35969	0.0750646	Other
ZA	South Africa	Cheirostylis	27	36082	0.0748296	Other
ZA	South Africa	Cynorkis	27	36082	0.0748296	Other
CN	China	Oberonioides	36	48939	0.073561	Other
CN	China	Porpax	36	48939	0.073561	Other
US	United States	Cymbidium	119	161921	0.0734926	Other
MX	Mexico	Coryanthes	26	35600	0.0730337	Other
BR	Brazil	Galeottia	21	28787	0.0729496	Other
BR	Brazil	Phragmipedium	21	28787	0.0729496	Other
DE	Germany	Epipogium	102	140149	0.0727797	Other
EC	Ecuador	Miltoniopsis	15	20798	0.0721223	Other
EC	Ecuador	Zootrophion	15	20798	0.0721223	Other
ZA	South Africa	Microcoelia	26	36082	0.0720581	Other
ZA	South Africa	Platylepis	26	36082	0.0720581	Other
AU	Australia	Zeuxine	140	195238	0.0717074	Other
CN	China	Rhynchostylis	35	48939	0.0715176	Other
CN	China	Tipularia	35	48939	0.0715176	Other
ES	Spain	Cypripedium	24	33728	0.0711575	Other
US	United States	Cattleya	115	161921	0.0710223	Other
MX	Mexico	Xylobium	25	35600	0.0702247	Other
CO	Colombia	Cyrtopodium	347	494671	0.0701476	Other
CH	Switzerland	Serapias	100	143131	0.0698661	Other
AU	Australia	Oberonia	136	195238	0.0696586	Other
NZ	New Zealand	Cryptostylis	25	35937	0.0695662	Other
BR	Brazil	Buchtienia	20	28787	0.0694758	Other
BR	Brazil	Scuticaria	20	28787	0.0694758	Other
BR	Brazil	Zygosepalum	20	28787	0.0694758	Other
CN	China	Acanthephippium	34	48939	0.0694742	Other
MX	Mexico	Acineta	24	35600	0.0674157	Other
MX	Mexico	Stenorrhynchos	24	35600	0.0674157	Other
EC	Ecuador	Coccineorchis	14	20798	0.0673142	Other
EC	Ecuador	Huntleya	14	20798	0.0673142	Other
EC	Ecuador	Lycaste	14	20798	0.0673142	Other
MG	Madagascar	Angraecopsis	13	19336	0.0672321	Other
MG	Madagascar	Corymborkis	13	19336	0.0672321	Other
NZ	New Zealand	Danhatchia	24	35937	0.0667835	Other
BR	Brazil	Mormodes	19	28787	0.066002	Other
FR	France	Herminium	712	1090089	0.0653158	Other
MX	Mexico	Dryadella	23	35600	0.0646067	Other
MX	Mexico	Muscarella	23	35600	0.0646067	Other
US	United States	Ionopsis	104	161921	0.0642289	Other
AU	Australia	Nervilia	125	195238	0.0640244	Other
BR	Brazil	Orleanesia	18	28787	0.0625282	Other
EC	Ecuador	Trichocentrum	13	20798	0.062506	Other
CO	Colombia	Gomphichis	307	494671	0.0620615	Other
MX	Mexico	Dendrophylax	22	35600	0.0617978	Other
CN	China	Aerides	30	48939	0.0613008	Other
ES	Spain	Pseudorchis	20	33728	0.0592979	Other
MX	Mexico	Stenotyla	21	35600	0.0589888	Other
CA	Canada	Hammarbya	34	57799	0.0588245	Other
AU	Australia	Praecoxanthus	113	195238	0.0578781	Other
EC	Ecuador	Draconanthes	12	20798	0.0576979	Other
EC	Ecuador	Pescatoria	12	20798	0.0576979	Other
EC	Ecuador	Pleurothallopsis	12	20798	0.0576979	Other
EC	Ecuador	Teagueia	12	20798	0.0576979	Other
CN	China	Campanulorchis	28	48939	0.0572141	Other
MG	Madagascar	Ypsilopus	11	19336	0.0568887	Other
US	United States	Cyrtopodium	92	161921	0.0568178	Other
MX	Mexico	Dimerandra	20	35600	0.0561798	Other
MX	Mexico	Galeottiella	20	35600	0.0561798	Other
FI	Finland	Ophrys	22	39394	0.0558461	Other
AU	Australia	Epidendrum	109	195238	0.0558293	Other
BR	Brazil	Constantia	16	28787	0.0555806	Other
BR	Brazil	Pogoniopsis	16	28787	0.0555806	Other
BR	Brazil	Stanhopea	16	28787	0.0555806	Other
MX	Mexico	Psilochilus	19	35600	0.0533708	Other
EC	Ecuador	Bulbophyllum	11	20798	0.0528897	Other
EC	Ecuador	Cycnoches	11	20798	0.0528897	Other
EC	Ecuador	Frondaria	11	20798	0.0528897	Other
EC	Ecuador	Mormodes	11	20798	0.0528897	Other
EC	Ecuador	Pelexia	11	20798	0.0528897	Other
EC	Ecuador	Psilochilus	11	20798	0.0528897	Other
EC	Ecuador	Sievekingia	11	20798	0.0528897	Other
EC	Ecuador	Warczewiczella	11	20798	0.0528897	Other
GP	Guadeloupe	Dendrobium	13	24623	0.0527962	Other
ZA	South Africa	Calanthe	19	36082	0.0526578	Other
BR	Brazil	Lepanthopsis	15	28787	0.0521069	Other
CO	Colombia	Vanilla	253	494671	0.0511451	Other
CN	China	Hetaeria	25	48939	0.051084	Other
MX	Mexico	Macroclinium	18	35600	0.0505618	Other
MX	Mexico	Tropidia	18	35600	0.0505618	Other
AU	Australia	Spiculaea	97	195238	0.049683	Other
CN	China	Cylindrolobus	24	48939	0.0490406	Other
CN	China	Podochilus	24	48939	0.0490406	Other
BR	Brazil	Cycnoches	14	28787	0.0486331	Other
BR	Brazil	Pabstia	14	28787	0.0486331	Other
EC	Ecuador	Lycomormium	10	20798	0.0480815	Other
EC	Ecuador	Pendusalpinx	10	20798	0.0480815	Other
EC	Ecuador	Stenorrhynchos	10	20798	0.0480815	Other
EC	Ecuador	Trizeuxis	10	20798	0.0480815	Other
MX	Mexico	Microchilus	17	35600	0.0477528	Other
US	United States	Laeliocattleya	77	161921	0.0475541	Other
CO	Colombia	Platystele	234	494671	0.0473042	Other
AU	Australia	Peristeranthus	92	195238	0.047122	Other
CN	China	Tuberolabium	23	48939	0.0469973	Other
RU	Russia	Cremastra	18	38594	0.0466394	Other
AU	Australia	Townsonia	91	195238	0.0466098	Other
AU	Australia	Taeniophyllum	90	195238	0.0460976	Other
IT	Italy	Gennaria	15	32584	0.0460349	Other
CN	China	Trichotosia	22	48939	0.0449539	Other
MX	Mexico	Hintonella	16	35600	0.0449438	Other
CO	Colombia	Fernandezia	222	494671	0.0448783	Other
EC	Ecuador	Cleistes	9	20798	0.0432734	Other
EC	Ecuador	Cyrtochiloides	9	20798	0.0432734	Other
EC	Ecuador	Leochilus	9	20798	0.0432734	Other
EC	Ecuador	Pabstiella	9	20798	0.0432734	Other
EC	Ecuador	Pseudocentrum	9	20798	0.0432734	Other
EC	Ecuador	Sarcoglottis	9	20798	0.0432734	Other
CN	China	Calypso	21	48939	0.0429106	Other
CO	Colombia	Pleurothallopsis	211	494671	0.0426546	Other
AU	Australia	Rhinerrhiza	82	195238	0.042	Other
BR	Brazil	Caularthron	12	28787	0.0416855	Other
BR	Brazil	Eriopsis	12	28787	0.0416855	Other
BR	Brazil	Erythrodes	12	28787	0.0416855	Other
BR	Brazil	Lyroglossa	12	28787	0.0416855	Other
BR	Brazil	Macradenia	12	28787	0.0416855	Other
BR	Brazil	Thelyschista	12	28787	0.0416855	Other
BR	Brazil	Zeuxine	12	28787	0.0416855	Other
US	United States	Oncidium	67	161921	0.0413782	Other
MG	Madagascar	Didymoplexis	8	19336	0.0413736	Other
CN	China	Pachystoma	20	48939	0.0408672	Other
AU	Australia	Burnettia	77	195238	0.039439	Other
AU	Australia	Rimacola	77	195238	0.039439	Other
MX	Mexico	Oncidum	14	35600	0.0393258	Other
RU	Russia	Pogonia	15	38594	0.0388661	Other
RU	Russia	Pseudorchis	15	38594	0.0388661	Other
CN	China	Apostasia	19	48939	0.0388238	Other
CN	China	Polystachya	19	48939	0.0388238	Other
CN	China	Thelasis	19	48939	0.0388238	Other
CN	China	Thunia	19	48939	0.0388238	Other
EC	Ecuador	Diodonopsis	8	20798	0.0384652	Other
EC	Ecuador	Eulophia	8	20798	0.0384652	Other
BR	Brazil	Plectrophora	11	28787	0.0382117	Other
AU	Australia	Dienia	74	195238	0.0379025	Other
CO	Colombia	Telipogon	184	494671	0.0371964	Other
IT	Italy	Herminium	12	32584	0.0368279	Other
CN	China	Cymbilabia	18	48939	0.0367805	Other
CN	China	Renanthera	18	48939	0.0367805	Other
MX	Mexico	Microepidendrum	13	35600	0.0365169	Other
US	United States	Trichocentrum	59	161921	0.0364375	Other
AU	Australia	Pseudovanilla	71	195238	0.0363659	Other
CA	Canada	Habenaria	21	57799	0.0363328	Other
MG	Madagascar	Erasanthe	7	19336	0.0362019	Other
NZ	New Zealand	Taeniophyllum	13	35937	0.0361744	Other
ZA	South Africa	Vanilla	13	36082	0.036029	Other
CO	Colombia	Stenorrhynchos	178	494671	0.0359835	Other
CH	Switzerland	Hammarbya	51	143131	0.0356317	Other
CO	Colombia	Prescottia	175	494671	0.035377	Other
US	United States	Vanda	57	161921	0.0352024	Other
AT	Austria	Hammarbya	16	45728	0.0349895	Other
BR	Brazil	Centroglossa	10	28787	0.0347379	Other
BR	Brazil	Cyrtochilum	10	28787	0.0347379	Other
BR	Brazil	Platystele	10	28787	0.0347379	Other
BR	Brazil	Warrea	10	28787	0.0347379	Other
CN	China	Risleya	17	48939	0.0347371	Other
US	United States	Campylocentrum	56	161921	0.0345848	Other
CO	Colombia	Dracula	171	494671	0.0345684	Other
CO	Colombia	Habenaria	168	494671	0.033962	Other
MX	Mexico	Cyrtochiloides	12	35600	0.0337079	Other
EC	Ecuador	Cischweinfia	7	20798	0.0336571	Other
EC	Ecuador	Clowesia	7	20798	0.0336571	Other
EC	Ecuador	Oliveriana	7	20798	0.0336571	Other
EC	Ecuador	Polycycnis	7	20798	0.0336571	Other
CN	China	Changnienia	16	48939	0.0326938	Other
GP	Guadeloupe	Specklinia	8	24623	0.0324899	Other
CO	Colombia	Trizeuxis	160	494671	0.0323447	Other
US	United States	Dendrobium	52	161921	0.0321144	Other
US	United States	Eltroplectris	52	161921	0.0321144	Other
BR	Brazil	Polycycnis	9	28787	0.0312641	Other
BR	Brazil	Solenidium	9	28787	0.0312641	Other
CO	Colombia	Brassavola	153	494671	0.0309296	Other
MX	Mexico	Barbosella	11	35600	0.0308989	Other
CN	China	Callostylis	15	48939	0.0306504	Other
CN	China	Pomatocalpa	15	48939	0.0306504	Other
CN	China	Sarcoglyphis	15	48939	0.0306504	Other
ZA	South Africa	Acampe	11	36082	0.0304861	Other
ES	Spain	Epipogium	10	33728	0.029649	Other
EC	Ecuador	Benzingia	6	20798	0.0288489	Other
EC	Ecuador	Paphinia	6	20798	0.0288489	Other
EC	Ecuador	Peristeria	6	20798	0.0288489	Other
EC	Ecuador	Psychopsis	6	20798	0.0288489	Other
CN	China	Microstylis	14	48939	0.028607	Other
RU	Russia	Ephippianthus	11	38594	0.0285018	Other
AU	Australia	Adenochilus	55	195238	0.0281707	Other
MX	Mexico	Hagsatera	10	35600	0.0280899	Other
FR	France	Gennaria	303	1090089	0.0277959	Other
BR	Brazil	Lueckelia	8	28787	0.0277903	Other
BR	Brazil	Macroclinium	8	28787	0.0277903	Other
BR	Brazil	Nohawilliamsia	8	28787	0.0277903	Other
BR	Brazil	Uleiorchis	8	28787	0.0277903	Other
BR	Brazil	Xerorchis	8	28787	0.0277903	Other
ZA	South Africa	Bolusiella	10	36082	0.0277146	Other
CO	Colombia	Otoglossum	137	494671	0.0276952	Other
CA	Canada	Triphora	16	57799	0.0276821	Other
IT	Italy	Malaxis	9	32584	0.0276209	Other
CO	Colombia	Acianthera	136	494671	0.027493	Other
CO	Colombia	Scaphosepalum	135	494671	0.0272909	Other
GB	United Kingdom	Cypripedium	42	154382	0.0272052	Other
AU	Australia	Stigmatodactylus	53	195238	0.0271464	Other
CO	Colombia	Restrepia	133	494671	0.0268866	Other
CO	Colombia	Cycnoches	132	494671	0.0266844	Other
ES	Spain	Corallorhiza	9	33728	0.0266841	Other
CN	China	Vandopsis	13	48939	0.0265637	Other
SE	Sweden	Spiranthes	87	329857	0.0263751	Other
US	United States	Brassolaeliocattleya	42	161921	0.0259386	Other
MG	Madagascar	Hetaeria	5	19336	0.0258585	Other
MG	Madagascar	Imerinaea	5	19336	0.0258585	Other
MG	Madagascar	Malaxis	5	19336	0.0258585	Other
US	United States	Phalaenopsis	41	161921	0.025321	Other
MX	Mexico	Kefersteinia	9	35600	0.0252809	Other
MX	Mexico	Physogyne	9	35600	0.0252809	Other
MX	Mexico	Pteroglossa	9	35600	0.0252809	Other
NZ	New Zealand	Epidendrum	9	35937	0.0250438	Other
DE	Germany	Limodorum	35	140149	0.0249734	Other
AU	Australia	Cheirostylis	48	195238	0.0245854	Other
IT	Italy	Epipogium	8	32584	0.0245519	Other
CN	China	Diplomeris	12	48939	0.0245203	Other
CN	China	Uncifera	12	48939	0.0245203	Other
BR	Brazil	Muscarella	7	28787	0.0243165	Other
BR	Brazil	Palmorchis	7	28787	0.0243165	Other
BR	Brazil	Ponthieva	7	28787	0.0243165	Other
BR	Brazil	Rudolfiella	7	28787	0.0243165	Other
EC	Ecuador	Chaubardia	5	20798	0.0240408	Other
EC	Ecuador	Chondrorhyncha	5	20798	0.0240408	Other
EC	Ecuador	Cryptarrhena	5	20798	0.0240408	Other
EC	Ecuador	Macradenia	5	20798	0.0240408	Other
EC	Ecuador	Plectrophora	5	20798	0.0240408	Other
AU	Australia	Epipogium	46	195238	0.023561	Other
RU	Russia	Serapias	9	38594	0.0233197	Other
AU	Australia	Apostasia	45	195238	0.0230488	Other
US	United States	Cyclopogon	37	161921	0.0228506	Other
CN	China	Chamaegastrodia	11	48939	0.022477	Other
CN	China	Hancockia	11	48939	0.022477	Other
MX	Mexico	Galeandra	8	35600	0.0224719	Other
MX	Mexico	Myoxanthus	8	35600	0.0224719	Other
US	United States	Aspidogyne	36	161921	0.0222331	Other
ZA	South Africa	Zeuxine	8	36082	0.0221717	Other
US	United States	Paphiopedilum	35	161921	0.0216155	Other
BR	Brazil	Baskervilla	6	28787	0.0208427	Other
BR	Brazil	Chloraea	6	28787	0.0208427	Other
BR	Brazil	Duckeella	6	28787	0.0208427	Other
BR	Brazil	Espinhassoa	6	28787	0.0208427	Other
BR	Brazil	Lepanthes	6	28787	0.0208427	Other
BR	Brazil	Platyrhiza	6	28787	0.0208427	Other
BR	Brazil	Quekettia	6	28787	0.0208427	Other
BR	Brazil	Spiranthes	6	28787	0.0208427	Other
BR	Brazil	Warmingia	6	28787	0.0208427	Other
MG	Madagascar	Gastrodia	4	19336	0.0206868	Other
CN	China	Neofinetia	10	48939	0.0204336	Other
US	United States	Stelis	33	161921	0.0203803	Other
MX	Mexico	Aa	7	35600	0.0196629	Other
MX	Mexico	Fernandezia	7	35600	0.0196629	Other
ZA	South Africa	Corymborkis	7	36082	0.0194003	Other
EC	Ecuador	Anguloa	4	20798	0.0192326	Other
EC	Ecuador	Aspasia	4	20798	0.0192326	Other
EC	Ecuador	Epistephium	4	20798	0.0192326	Other
EC	Ecuador	Galeandra	4	20798	0.0192326	Other
EC	Ecuador	Galeottia	4	20798	0.0192326	Other
EC	Ecuador	Ophidion	4	20798	0.0192326	Other
EC	Ecuador	Rudolfiella	4	20798	0.0192326	Other
EC	Ecuador	Spathoglottis	4	20798	0.0192326	Other
EC	Ecuador	Stephanothelys	4	20798	0.0192326	Other
EC	Ecuador	Tropidia	4	20798	0.0192326	Other
CO	Colombia	Andinia	95	494671	0.0192047	Other
CO	Colombia	Arundina	93	494671	0.0188004	Other
GB	United Kingdom	Dactylodenia	29	154382	0.0187846	Other
CN	China	Bambuseria	9	48939	0.0183902	Other
CN	China	Neuwiedia	9	48939	0.0183902	Other
CN	China	Stereosandra	9	48939	0.0183902	Other
CN	China	Vrydagzynea	9	48939	0.0183902	Other
CN	China	Yoania	9	48939	0.0183902	Other
RU	Russia	Odontochilus	7	38594	0.0181375	Other
CO	Colombia	Jacquiniella	89	494671	0.0179918	Other
AU	Australia	Epiblema	35	195238	0.0179268	Other
CO	Colombia	Cranichis	88	494671	0.0177896	Other
FI	Finland	Liparis	7	39394	0.0177692	Other
AU	Australia	Chiloschista	34	195238	0.0174146	Other
CO	Colombia	Bulbophyllum	86	494671	0.0173853	Other
BR	Brazil	Braemia	5	28787	0.017369	Other
BR	Brazil	Nemaconia	5	28787	0.017369	Other
CO	Colombia	Lepanthopsis	85	494671	0.0171831	Other
CO	Colombia	Ponthieva	85	494671	0.0171831	Other
MX	Mexico	Caularthron	6	35600	0.0168539	Other
MX	Mexico	Erythrodes	6	35600	0.0168539	Other
MX	Mexico	Kreodanthus	6	35600	0.0168539	Other
MX	Mexico	Macradenia	6	35600	0.0168539	Other
MX	Mexico	Pseudogoodyera	6	35600	0.0168539	Other
MX	Mexico	Svenkoeltzia	6	35600	0.0168539	Other
ZA	South Africa	Centrostigma	6	36082	0.0166288	Other
ZA	South Africa	Epidendrum	6	36082	0.0166288	Other
CO	Colombia	Erycina	82	494671	0.0165767	Other
CN	China	Disperis	8	48939	0.0163469	Other
CN	China	Hylophila	8	48939	0.0163469	Other
CN	China	Nephelaphyllum	8	48939	0.0163469	Other
CN	China	Oxystophyllum	8	48939	0.0163469	Other
GP	Guadeloupe	Spiranthes	4	24623	0.016245	Other
US	United States	Tolumnia	26	161921	0.0160572	Other
RU	Russia	Eleorchis	6	38594	0.0155465	Other
RU	Russia	Gastrodia	6	38594	0.0155465	Other
MG	Madagascar	Brachycorythis	3	19336	0.0155151	Other
MG	Madagascar	Platycoryne	3	19336	0.0155151	Other
AT	Austria	Pseudadenia	7	45728	0.0153079	Other
CO	Colombia	Malaxis	74	494671	0.0149594	Other
ES	Spain	Serapicamptis	5	33728	0.0148245	Other
US	United States	Tamayorkis	24	161921	0.014822	Other
EC	Ecuador	Batemannia	3	20798	0.0144245	Other
EC	Ecuador	Caluera	3	20798	0.0144245	Other
EC	Ecuador	Coryanthes	3	20798	0.0144245	Other
EC	Ecuador	Echinosepala	3	20798	0.0144245	Other
EC	Ecuador	Eltroplectris	3	20798	0.0144245	Other
EC	Ecuador	Houlletia	3	20798	0.0144245	Other
EC	Ecuador	Kreodanthus	3	20798	0.0144245	Other
EC	Ecuador	Mesadenella	3	20798	0.0144245	Other
EC	Ecuador	Nidema	3	20798	0.0144245	Other
EC	Ecuador	Selenipedium	3	20798	0.0144245	Other
EC	Ecuador	Spiranthes	3	20798	0.0144245	Other
EC	Ecuador	Stenia	3	20798	0.0144245	Other
EC	Ecuador	Trichophila	3	20798	0.0144245	Other
EC	Ecuador	Zelenkoa	3	20798	0.0144245	Other
CN	China	Corymborkis	7	48939	0.0143035	Other
CN	China	Ludisia	7	48939	0.0143035	Other
CN	China	Stigmatodactylus	7	48939	0.0143035	Other
US	United States	Coelogyne	23	161921	0.0142045	Other
US	United States	Maxillaria	23	161921	0.0142045	Other
MX	Mexico	Phragmipedium	5	35600	0.0140449	Other
MX	Mexico	Scaphosepalum	5	35600	0.0140449	Other
CO	Colombia	Cyclopogon	69	494671	0.0139487	Other
BR	Brazil	Batemannia	4	28787	0.0138952	Other
BR	Brazil	Echinosepala	4	28787	0.0138952	Other
BR	Brazil	Ida	4	28787	0.0138952	Other
BR	Brazil	Phloeophila	4	28787	0.0138952	Other
BR	Brazil	Sanderella	4	28787	0.0138952	Other
BR	Brazil	Triphora	4	28787	0.0138952	Other
BR	Brazil	Warczewiczella	4	28787	0.0138952	Other
ZA	South Africa	Didymoplexis	5	36082	0.0138573	Other
AU	Australia	Rhizanthella	27	195238	0.0138293	Other
AT	Austria	Gymnadenia x Nigritella	6	45728	0.0131211	Other
NL	Netherlands	Coelogyne	3	23021	0.0130316	Other
NL	Netherlands	Corallorhiza	3	23021	0.0130316	Other
US	United States	Pleurothallis	21	161921	0.0129693	Other
AU	Australia	Phreatia	25	195238	0.0128049	Other
CO	Colombia	Xylobium	63	494671	0.0127357	Other
US	United States	Aerides	20	161921	0.0123517	Other
US	United States	Miltonia	20	161921	0.0123517	Other
AU	Australia	Corymborkis	24	195238	0.0122927	Other
IT	Italy	Liparis	4	32584	0.012276	Other
CN	China	Hsenhsua	6	48939	0.0122602	Other
GP	Guadeloupe	Pseudocentrum	3	24623	0.0121837	Other
US	United States	Beloglottis	19	161921	0.0117341	Other
US	United States	Brassocattleya	19	161921	0.0117341	Other
US	United States	Cranichis	19	161921	0.0117341	Other
US	United States	Hammarbya	19	161921	0.0117341	Other
CO	Colombia	Brassia	58	494671	0.011725	Other
CO	Colombia	Epistephium	58	494671	0.011725	Other
CO	Colombia	Phragmipedium	56	494671	0.0113207	Other
CO	Colombia	Specklinia	56	494671	0.0113207	Other
AU	Australia	Pinalia	22	195238	0.0112683	Other
MX	Mexico	Arundina	4	35600	0.011236	Other
MX	Mexico	Plectrophora	4	35600	0.011236	Other
MX	Mexico	Wullschlaegelia	4	35600	0.011236	Other
ZA	South Africa	Jumellea	4	36082	0.0110859	Other
AU	Australia	Coelogyne	21	195238	0.0107561	Other
CO	Colombia	Microchilus	53	494671	0.0107142	Other
CO	Colombia	Miltoniopsis	52	494671	0.010512	Other
US	United States	Coenoemersa	17	161921	0.0104989	Other
BR	Brazil	Bipinnula	3	28787	0.0104214	Other
BR	Brazil	Chaubardia	3	28787	0.0104214	Other
BR	Brazil	Cochleanthes	3	28787	0.0104214	Other
BR	Brazil	Cryptarrhena	3	28787	0.0104214	Other
BR	Brazil	Hoehneella	3	28787	0.0104214	Other
BR	Brazil	Leochilus	3	28787	0.0104214	Other
BR	Brazil	Nidema	3	28787	0.0104214	Other
BR	Brazil	Otostylis	3	28787	0.0104214	Other
BR	Brazil	Pescatoria	3	28787	0.0104214	Other
BR	Brazil	Psychopsiella	3	28787	0.0104214	Other
BR	Brazil	Saundersia	3	28787	0.0104214	Other
BR	Brazil	Thysanoglossa	3	28787	0.0104214	Other
BR	Brazil	Trichopilia	3	28787	0.0104214	Other
BR	Brazil	Tropidia	3	28787	0.0104214	Other
BR	Brazil	Zootrophion	3	28787	0.0104214	Other
RU	Russia	Pecteilis	4	38594	0.0103643	Other
MG	Madagascar	Epidendrum	2	19336	0.0103434	Other
CN	China	Grosourdya	5	48939	0.0102168	Other
CO	Colombia	Trichosalpinx	50	494671	0.0101077	Other
AU	Australia	Robiquetia	19	195238	0.00973171	Other
CO	Colombia	Gongora	48	494671	0.00970342	Other
EC	Ecuador	Beloglottis	2	20798	0.00961631	Other
EC	Ecuador	Bifrenaria	2	20798	0.00961631	Other
EC	Ecuador	Calanthe	2	20798	0.00961631	Other
EC	Ecuador	Corymborkis	2	20798	0.00961631	Other
EC	Ecuador	Cybebus	2	20798	0.00961631	Other
EC	Ecuador	Dresslerella	2	20798	0.00961631	Other
EC	Ecuador	Dressleria	2	20798	0.00961631	Other
EC	Ecuador	Eloyella	2	20798	0.00961631	Other
EC	Ecuador	Eurystyles	2	20798	0.00961631	Other
EC	Ecuador	Hapalorchis	2	20798	0.00961631	Other
EC	Ecuador	Helleriella	2	20798	0.00961631	Other
EC	Ecuador	Ixyophora	2	20798	0.00961631	Other
EC	Ecuador	Jacquiniella	2	20798	0.00961631	Other
EC	Ecuador	Macroclinium	2	20798	0.00961631	Other
EC	Ecuador	Poaephyllum	2	20798	0.00961631	Other
EC	Ecuador	Sacoila	2	20798	0.00961631	Other
EC	Ecuador	Stellamaris	2	20798	0.00961631	Other
EC	Ecuador	Teuscheria	2	20798	0.00961631	Other
EC	Ecuador	Warrea	2	20798	0.00961631	Other
US	United States	Mesadenus	15	161921	0.00926378	Other
CO	Colombia	Cleistes	45	494671	0.00909696	Other
CO	Colombia	Stanhopea	45	494671	0.00909696	Other
AU	Australia	Thrixspermum	17	195238	0.00870732	Other
NL	Netherlands	Dactylodenia	2	23021	0.00868772	Other
NL	Netherlands	Serapias	2	23021	0.00868772	Other
US	United States	Bletilla	14	161921	0.00864619	Other
MX	Mexico	Cryptarrhena	3	35600	0.00842697	Other
MX	Mexico	Cyrtochilum	3	35600	0.00842697	Other
MX	Mexico	Dracula	3	35600	0.00842697	Other
MX	Mexico	Eurystyles	3	35600	0.00842697	Other
MX	Mexico	Rodriguezia	3	35600	0.00842697	Other
MX	Mexico	Teuscheria	3	35600	0.00842697	Other
NZ	New Zealand	Caleana	3	35937	0.00834794	Other
CO	Colombia	Muscarella	41	494671	0.00828834	Other
AU	Australia	Octarrhena	16	195238	0.00819513	Other
CN	China	Didymoplexiella	4	48939	0.00817344	Other
CO	Colombia	Kefersteinia	40	494671	0.00808618	Other
FR	France	Hammarbya	88	1090089	0.00807274	Other
US	United States	Laelia	13	161921	0.00802861	Other
US	United States	Sophrolaeliocattleya	13	161921	0.00802861	Other
CO	Colombia	Anathallis	39	494671	0.00788403	Other
GB	United Kingdom	Epipogium	12	154382	0.00777293	Other
AU	Australia	Bromheadia	15	195238	0.00768293	Other
AU	Australia	Luisia	15	195238	0.00768293	Other
CO	Colombia	Dendrobium	38	494671	0.00768187	Other
CO	Colombia	Pterichis	38	494671	0.00768187	Other
CO	Colombia	Dryadella	37	494671	0.00747972	Other
CO	Colombia	Gravendeelia	37	494671	0.00747972	Other
CO	Colombia	Octomeria	37	494671	0.00747972	Other
US	United States	Brassavola	12	161921	0.00741102	Other
US	United States	Bulbophyllum	12	161921	0.00741102	Other
US	United States	Dichromanthus	12	161921	0.00741102	Other
US	United States	Schiedeella	12	161921	0.00741102	Other
US	United States	Stanhopea	12	161921	0.00741102	Other
AU	Australia	Podochilus	14	195238	0.00717074	Other
DE	Germany	Gymnadenia x Nigritella	10	140149	0.00713526	Other
GB	United Kingdom	Serapias	11	154382	0.00712518	Other
CO	Colombia	Aa	35	494671	0.00707541	Other
CO	Colombia	Galeandra	35	494671	0.00707541	Other
CO	Colombia	Myoxanthus	35	494671	0.00707541	Other
BR	Brazil	Catyclia	2	28787	0.00694758	Other
BR	Brazil	Coelogyne	2	28787	0.00694758	Other
BR	Brazil	Cotylolabium	2	28787	0.00694758	Other
BR	Brazil	Discyphus	2	28787	0.00694758	Other
BR	Brazil	Lycaste	2	28787	0.00694758	Other
BR	Brazil	Otoglossum	2	28787	0.00694758	Other
BR	Brazil	Peristylus	2	28787	0.00694758	Other
BR	Brazil	Polyotidium	2	28787	0.00694758	Other
BR	Brazil	Spathoglottis	2	28787	0.00694758	Other
CA	Canada	Isotria	4	57799	0.00692053	Other
CO	Colombia	Ornithocephalus	34	494671	0.00687326	Other
US	United States	Miltoniopsis	11	161921	0.00679344	Other
AU	Australia	Bryobium	13	195238	0.00665854	Other
AU	Australia	Didymoplexis	13	195238	0.00665854	Other
AU	Australia	Saccolabiopsis	13	195238	0.00665854	Other
CO	Colombia	Brachionidium	32	494671	0.00646895	Other
CO	Colombia	Campylocentrum	32	494671	0.00646895	Other
CO	Colombia	Govenia	32	494671	0.00646895	Other
CO	Colombia	Guarianthe	31	494671	0.00626679	Other
CO	Colombia	Porroglossum	31	494671	0.00626679	Other
US	United States	Gomesa	10	161921	0.00617585	Other
AU	Australia	Danhatchia	12	195238	0.00614634	Other
AU	Australia	Mobilabium	12	195238	0.00614634	Other
AU	Australia	Pomatocalpa	12	195238	0.00614634	Other
AU	Australia	Spathoglottis	12	195238	0.00614634	Other
IT	Italy	Risleya	2	32584	0.00613798	Other
CN	China	Acriopsis	3	48939	0.00613008	Other
CN	China	Bryobium	3	48939	0.00613008	Other
CN	China	Eriodes	3	48939	0.00613008	Other
CN	China	Mycaranthes	3	48939	0.00613008	Other
CN	China	Plocoglottis	3	48939	0.00613008	Other
CN	China	Saccolabiopsis	3	48939	0.00613008	Other
CN	China	Tsaiorchis	3	48939	0.00613008	Other
ES	Spain	Dactylodenia	2	33728	0.00592979	Other
CO	Colombia	Ionopsis	28	494671	0.00566033	Other
AU	Australia	Anoectochilus	11	195238	0.00563415	Other
MX	Mexico	Amoana	2	35600	0.00561798	Other
MX	Mexico	Calopogon	2	35600	0.00561798	Other
MX	Mexico	Caucaea	2	35600	0.00561798	Other
MX	Mexico	Crossoliparis	2	35600	0.00561798	Other
MX	Mexico	Lepanthopsis	2	35600	0.00561798	Other
MX	Mexico	Microstylis	2	35600	0.00561798	Other
MX	Mexico	Rhynchostylis	2	35600	0.00561798	Other
NZ	New Zealand	Bletilla	2	35937	0.00556529	Other
EE	Estonia	Cirrhaea	2	35969	0.00556034	Other
EE	Estonia	Dactylodenia	2	35969	0.00556034	Other
US	United States	Angraecum	9	161921	0.00555827	Other
US	United States	Guarianthe	9	161921	0.00555827	Other
US	United States	Phragmipedium	9	161921	0.00555827	Other
ZA	South Africa	Diaphananthe	2	36082	0.00554293	Other
ZA	South Africa	Platycoryne	2	36082	0.00554293	Other
CO	Colombia	Gomesa	27	494671	0.00545817	Other
CO	Colombia	Ida	26	494671	0.00525602	Other
CO	Colombia	Nidema	26	494671	0.00525602	Other
CA	Canada	Tipularia	3	57799	0.0051904	Other
RU	Russia	Dactylodenia	2	38594	0.00518215	Other
MG	Madagascar	Aa	1	19336	0.0051717	Other
MG	Madagascar	Agrostophyllum	1	19336	0.0051717	Other
MG	Madagascar	Ambrella	1	19336	0.0051717	Other
MG	Madagascar	Arundina	1	19336	0.0051717	Other
MG	Madagascar	Brownleea	1	19336	0.0051717	Other
MG	Madagascar	Gastrochilus	1	19336	0.0051717	Other
MG	Madagascar	Lemurorchis	1	19336	0.0051717	Other
MG	Madagascar	Megalorchis	1	19336	0.0051717	Other
MG	Madagascar	Pelexia	1	19336	0.0051717	Other
MG	Madagascar	Peristylus	1	19336	0.0051717	Other
MG	Madagascar	Tainia	1	19336	0.0051717	Other
MG	Madagascar	Zeuxine	1	19336	0.0051717	Other
AU	Australia	Aphyllorchis	10	195238	0.00512195	Other
AU	Australia	Goodyera	10	195238	0.00512195	Other
AU	Australia	Hetaeria	10	195238	0.00512195	Other
US	United States	Anoectochilus	8	161921	0.00494068	Other
US	United States	Galeandra	8	161921	0.00494068	Other
CO	Colombia	Aganisia	24	494671	0.00485171	Other
CO	Colombia	Pterostemma	24	494671	0.00485171	Other
EC	Ecuador	Acineta	1	20798	0.00480815	Other
EC	Ecuador	Aetheorhyncha	1	20798	0.00480815	Other
EC	Ecuador	Chaubardiella	1	20798	0.00480815	Other
EC	Ecuador	Chysis	1	20798	0.00480815	Other
EC	Ecuador	Cochleanthes	1	20798	0.00480815	Other
EC	Ecuador	Cuitlauzina	1	20798	0.00480815	Other
EC	Ecuador	Cymbidium	1	20798	0.00480815	Other
EC	Ecuador	Cyrtopodium	1	20798	0.00480815	Other
EC	Ecuador	Cystorchis	1	20798	0.00480815	Other
EC	Ecuador	Dyakia	1	20798	0.00480815	Other
EC	Ecuador	Helonoma	1	20798	0.00480815	Other
EC	Ecuador	Lankesterella	1	20798	0.00480815	Other
EC	Ecuador	Lueddemannia	1	20798	0.00480815	Other
EC	Ecuador	Madisonia	1	20798	0.00480815	Other
EC	Ecuador	Oncidum	1	20798	0.00480815	Other
EC	Ecuador	Orchis	1	20798	0.00480815	Other
EC	Ecuador	Orleanesia	1	20798	0.00480815	Other
EC	Ecuador	Phalaenopsis	1	20798	0.00480815	Other
EC	Ecuador	Pterostemma	1	20798	0.00480815	Other
EC	Ecuador	Pupulinia	1	20798	0.00480815	Other
EC	Ecuador	Schlimia	1	20798	0.00480815	Other
EC	Ecuador	Scuticaria	1	20798	0.00480815	Other
EC	Ecuador	Soterosanthus	1	20798	0.00480815	Other
EC	Ecuador	Vainilla	1	20798	0.00480815	Other
EC	Ecuador	Warreopsis	1	20798	0.00480815	Other
EC	Ecuador	Warscewiczella	1	20798	0.00480815	Other
EC	Ecuador	Zygostates	1	20798	0.00480815	Other
CO	Colombia	Sertifera	23	494671	0.00464955	Other
CO	Colombia	Koellensteinia	22	494671	0.0044474	Other
AT	Austria	Bletia	2	45728	0.00437369	Other
AT	Austria	Gymnanacamptis	2	45728	0.00437369	Other
NL	Netherlands	Aerides	1	23021	0.00434386	Other
NL	Netherlands	Cymbidium	1	23021	0.00434386	Other
NL	Netherlands	Eria	1	23021	0.00434386	Other
NL	Netherlands	Habenaria	1	23021	0.00434386	Other
NL	Netherlands	Nervilia	1	23021	0.00434386	Other
NL	Netherlands	Paphiopedilum	1	23021	0.00434386	Other
NL	Netherlands	Phreatia	1	23021	0.00434386	Other
NL	Netherlands	Vanda	1	23021	0.00434386	Other
US	United States	Ansellia	7	161921	0.0043231	Other
US	United States	Funkiella	7	161921	0.0043231	Other
US	United States	Ludisia	7	161921	0.0043231	Other
US	United States	Pelexia	7	161921	0.0043231	Other
US	United States	Trichoglottis	7	161921	0.0043231	Other
CO	Colombia	Acineta	21	494671	0.00424525	Other
CO	Colombia	Cyanthera	21	494671	0.00424525	Other
CO	Colombia	Lockhartia	21	494671	0.00424525	Other
CO	Colombia	Spathoglottis	21	494671	0.00424525	Other
CO	Colombia	Trichopilia	21	494671	0.00424525	Other
AU	Australia	Phalaenopsis	8	195238	0.00409756	Other
AU	Australia	Pholidota	8	195238	0.00409756	Other
CN	China	Caladenia	2	48939	0.00408672	Other
CN	China	Diglyphosa	2	48939	0.00408672	Other
CN	China	Herpysma	2	48939	0.00408672	Other
CN	China	Hippeophyllum	2	48939	0.00408672	Other
CN	China	Pteroceras	2	48939	0.00408672	Other
CN	China	Pterygodium	2	48939	0.00408672	Other
CN	China	Smitinandia	2	48939	0.00408672	Other
CN	China	Staurochilus	2	48939	0.00408672	Other
CN	China	Xylobium	2	48939	0.00408672	Other
GP	Guadeloupe	Barbosella	1	24623	0.00406124	Other
GP	Guadeloupe	Myrmecophila	1	24623	0.00406124	Other
CO	Colombia	Vanda	20	494671	0.00404309	Other
CO	Colombia	Aspidogyne	19	494671	0.00384094	Other
CO	Colombia	Sacoila	19	494671	0.00384094	Other
US	United States	Catasetum	6	161921	0.00370551	Other
US	United States	Gongora	6	161921	0.00370551	Other
US	United States	Renanthera	6	161921	0.00370551	Other
CO	Colombia	Liparis	18	494671	0.00363878	Other
AU	Australia	Acriopsis	7	195238	0.00358537	Other
AU	Australia	Isotria	7	195238	0.00358537	Other
AU	Australia	Pachystoma	7	195238	0.00358537	Other
BR	Brazil	Aa	1	28787	0.00347379	Other
BR	Brazil	Adamantinia	1	28787	0.00347379	Other
BR	Brazil	Arachnis	1	28787	0.00347379	Other
BR	Brazil	Brachionidium	1	28787	0.00347379	Other
BR	Brazil	Brassocattleya	1	28787	0.00347379	Other
BR	Brazil	Bratonia	1	28787	0.00347379	Other
BR	Brazil	Calanthe	1	28787	0.00347379	Other
BR	Brazil	Calopogon	1	28787	0.00347379	Other
BR	Brazil	Cheiradenia	1	28787	0.00347379	Other
BR	Brazil	Chytroglossa	1	28787	0.00347379	Other
BR	Brazil	Cypripedium	1	28787	0.00347379	Other
BR	Brazil	Gomesia	1	28787	0.00347379	Other
BR	Brazil	Nothostele	1	28787	0.00347379	Other
BR	Brazil	Ornithocidium	1	28787	0.00347379	Other
BR	Brazil	Paphiopedilum	1	28787	0.00347379	Other
BR	Brazil	Peristeria	1	28787	0.00347379	Other
BR	Brazil	Phalaenopsis	1	28787	0.00347379	Other
BR	Brazil	Porphyrostachys	1	28787	0.00347379	Other
BR	Brazil	Rauhiella	1	28787	0.00347379	Other
BR	Brazil	Renanthera	1	28787	0.00347379	Other
BR	Brazil	Rhyncholaelia	1	28787	0.00347379	Other
BR	Brazil	Saccolabiopsis	1	28787	0.00347379	Other
BR	Brazil	Selenipedium	1	28787	0.00347379	Other
BR	Brazil	Stenoptera	1	28787	0.00347379	Other
CA	Canada	Coelogyne	2	57799	0.00346027	Other
CO	Colombia	Hofmeisterella	17	494671	0.00343663	Other
CO	Colombia	Anguloa	16	494671	0.00323447	Other
CO	Colombia	Caucaea	16	494671	0.00323447	Other
CO	Colombia	Lycaste	16	494671	0.00323447	Other
CO	Colombia	Rudolfiella	16	494671	0.00323447	Other
CO	Colombia	Warrea	16	494671	0.00323447	Other
CO	Colombia	Zootrophion	16	494671	0.00323447	Other
US	United States	Orthoceras	5	161921	0.00308793	Other
US	United States	Scaphyglottis	5	161921	0.00308793	Other
US	United States	Sobralia	5	161921	0.00308793	Other
AU	Australia	Oncidium	6	195238	0.00307317	Other
AU	Australia	Peristylus	6	195238	0.00307317	Other
AU	Australia	Schoenorchis	6	195238	0.00307317	Other
AU	Australia	Tropidia	6	195238	0.00307317	Other
IT	Italy	Bletilla	1	32584	0.00306899	Other
IT	Italy	Serapicamptis	1	32584	0.00306899	Other
IT	Italy	Vanilla	1	32584	0.00306899	Other
CO	Colombia	Duckeella	15	494671	0.00303232	Other
CO	Colombia	Eurystyles	15	494671	0.00303232	Other
CO	Colombia	Peristeria	15	494671	0.00303232	Other
ES	Spain	Epidendrum	1	33728	0.0029649	Other
CO	Colombia	Beclardia	14	494671	0.00283016	Other
CO	Colombia	Bletia	14	494671	0.00283016	Other
CO	Colombia	Calanthe	14	494671	0.00283016	Other
CO	Colombia	Pelexia	14	494671	0.00283016	Other
CO	Colombia	Pescatoria	14	494671	0.00283016	Other
MX	Mexico	Cattleya	1	35600	0.00280899	Other
MX	Mexico	Dendrobium	1	35600	0.00280899	Other
MX	Mexico	Eriopsis	1	35600	0.00280899	Other
MX	Mexico	Grammatophyllum	1	35600	0.00280899	Other
MX	Mexico	Hapalorchis	1	35600	0.00280899	Other
MX	Mexico	Helleriella	1	35600	0.00280899	Other
MX	Mexico	Lacaena	1	35600	0.00280899	Other
MX	Mexico	Lankesterella	1	35600	0.00280899	Other
MX	Mexico	Oberonia	1	35600	0.00280899	Other
MX	Mexico	Paphiopedilum	1	35600	0.00280899	Other
MX	Mexico	Phloeophila	1	35600	0.00280899	Other
MX	Mexico	Scaphoglottis	1	35600	0.00280899	Other
MX	Mexico	Tolumnia	1	35600	0.00280899	Other
MX	Mexico	Warrea	1	35600	0.00280899	Other
MX	Mexico	Zeuxine	1	35600	0.00280899	Other
NZ	New Zealand	Dactylorhiza	1	35937	0.00278265	Other
NZ	New Zealand	Diuris	1	35937	0.00278265	Other
NZ	New Zealand	Herminium	1	35937	0.00278265	Other
NZ	New Zealand	Sarcomoanthus	1	35937	0.00278265	Other
EE	Estonia	Epidendrum	1	35969	0.00278017	Other
EE	Estonia	Gavilea	1	35969	0.00278017	Other
EE	Estonia	Phalaenopsis	1	35969	0.00278017	Other
ZA	South Africa	Cattleya	1	36082	0.00277146	Other
ZA	South Africa	Octomeria	1	36082	0.00277146	Other
ZA	South Africa	Taeniophyllum	1	36082	0.00277146	Other
RU	Russia	Dactylanthera	1	38594	0.00259108	Other
GB	United Kingdom	Pseudadenia	4	154382	0.00259098	Other
AU	Australia	Drymoanthus	5	195238	0.00256098	Other
AU	Australia	Rhomboda	5	195238	0.00256098	Other
AU	Australia	Trachoma	5	195238	0.00256098	Other
FI	Finland	Cymbidium	1	39394	0.00253846	Other
US	United States	Acianthera	4	161921	0.00247034	Other
US	United States	Barkeria	4	161921	0.00247034	Other
US	United States	Brassia	4	161921	0.00247034	Other
US	United States	Rhynchostylis	4	161921	0.00247034	Other
US	United States	Sotoa	4	161921	0.00247034	Other
CO	Colombia	Coelogyne	12	494671	0.00242585	Other
CO	Colombia	Cymbidium	12	494671	0.00242585	Other
NO	Norway	Liparis	2	84098	0.00237818	Other
CO	Colombia	Chondroscaphe	11	494671	0.0022237	Other
CO	Colombia	Polycycnis	11	494671	0.0022237	Other
AT	Austria	Cymbidium	1	45728	0.00218684	Other
AT	Austria	Dactylodenia	1	45728	0.00218684	Other
AT	Austria	Orchinea	1	45728	0.00218684	Other
FR	France	Serapicamptis	23	1090089	0.00210992	Other
AU	Australia	Calassodia	4	195238	0.00204878	Other
CN	China	Anecochilus	1	48939	0.00204336	Other
CN	China	Brachypeza	1	48939	0.00204336	Other
CN	China	Bromheadia	1	48939	0.00204336	Other
CN	China	Chamaeanthus	1	48939	0.00204336	Other
CN	China	Eleorchis	1	48939	0.00204336	Other
CN	China	Pennilabium	1	48939	0.00204336	Other
CN	China	Ponera	1	48939	0.00204336	Other
CN	China	Rhyncholaelia	1	48939	0.00204336	Other
CN	China	Stelis	1	48939	0.00204336	Other
CN	China	Zygopetalum	1	48939	0.00204336	Other
CO	Colombia	Braemia	10	494671	0.00202155	Other
CO	Colombia	Erythrodes	10	494671	0.00202155	Other
CO	Colombia	Warczewiczella	10	494671	0.00202155	Other
FR	France	Dactylocamptis	21	1090089	0.00192645	Other
US	United States	Arachnis	3	161921	0.00185276	Other
US	United States	Bratonia	3	161921	0.00185276	Other
US	United States	Broughtonia	3	161921	0.00185276	Other
US	United States	Cleisostoma	3	161921	0.00185276	Other
US	United States	Gastrochilus	3	161921	0.00185276	Other
US	United States	Grammatophyllum	3	161921	0.00185276	Other
US	United States	Jumellea	3	161921	0.00185276	Other
US	United States	Lockhartia	3	161921	0.00185276	Other
US	United States	Lycaste	3	161921	0.00185276	Other
US	United States	Micropera	3	161921	0.00185276	Other
US	United States	Papilionanthe	3	161921	0.00185276	Other
US	United States	Platystele	3	161921	0.00185276	Other
US	United States	Pomatocalpa	3	161921	0.00185276	Other
US	United States	Potinara	3	161921	0.00185276	Other
US	United States	Specklinia	3	161921	0.00185276	Other
US	United States	Trichopilia	3	161921	0.00185276	Other
US	United States	Zygopetalum	3	161921	0.00185276	Other
CO	Colombia	Huntleya	9	494671	0.00181939	Other
CO	Colombia	Palmorchis	9	494671	0.00181939	Other
CO	Colombia	Sarcoglottis	9	494671	0.00181939	Other
CA	Canada	Bletilla	1	57799	0.00173013	Other
CA	Canada	Bulbophyllum	1	57799	0.00173013	Other
CA	Canada	Gomesa	1	57799	0.00173013	Other
CA	Canada	Oncidium	1	57799	0.00173013	Other
CA	Canada	Prosthechea	1	57799	0.00173013	Other
CA	Canada	Stanhopea	1	57799	0.00173013	Other
CO	Colombia	Altensteinia	8	494671	0.00161724	Other
CO	Colombia	Bifrenaria	8	494671	0.00161724	Other
CO	Colombia	Crossoglossa	8	494671	0.00161724	Other
CO	Colombia	Draconanthes	8	494671	0.00161724	Other
CO	Colombia	Houlletia	8	494671	0.00161724	Other
CO	Colombia	Mormodes	8	494671	0.00161724	Other
CO	Colombia	Polyotidium	8	494671	0.00161724	Other
CO	Colombia	Stellamaris	8	494671	0.00161724	Other
AU	Australia	Micropera	3	195238	0.00153659	Other
AU	Australia	Paphiopedilum	3	195238	0.00153659	Other
AU	Australia	Trichoglottis	3	195238	0.00153659	Other
AU	Australia	Vrydagzynea	3	195238	0.00153659	Other
AU	Australia	Wullschlaegelia	3	195238	0.00153659	Other
FR	France	Dactylodenia	16	1090089	0.00146777	Other
CO	Colombia	Isochilus	7	494671	0.00141508	Other
CO	Colombia	Stenia	7	494671	0.00141508	Other
CO	Colombia	Trisetella	7	494671	0.00141508	Other
US	United States	Brassolaelia	2	161921	0.00123517	Other
US	United States	Bryobium	2	161921	0.00123517	Other
US	United States	Degarmoara	2	161921	0.00123517	Other
US	United States	Dendrolirium	2	161921	0.00123517	Other
US	United States	Epicattleya	2	161921	0.00123517	Other
US	United States	Isabelia	2	161921	0.00123517	Other
US	United States	Luisia	2	161921	0.00123517	Other
US	United States	Microthelys	2	161921	0.00123517	Other
US	United States	Miltonidium	2	161921	0.00123517	Other
US	United States	Myrmecophila	2	161921	0.00123517	Other
US	United States	Odontonia	2	161921	0.00123517	Other
US	United States	Restrepia	2	161921	0.00123517	Other
US	United States	Rhyncholaelia	2	161921	0.00123517	Other
US	United States	Robiquetia	2	161921	0.00123517	Other
US	United States	Rossioglossum	2	161921	0.00123517	Other
US	United States	Scaphosepalum	2	161921	0.00123517	Other
US	United States	Trichoceros	2	161921	0.00123517	Other
US	United States	Vandopsis	2	161921	0.00123517	Other
US	United States	Zootrophion	2	161921	0.00123517	Other
CO	Colombia	Cyrtochiloides	6	494671	0.00121293	Other
CO	Colombia	Diodonopsis	6	494671	0.00121293	Other
CO	Colombia	Myrmecophila	6	494671	0.00121293	Other
CO	Colombia	Oliveriana	6	494671	0.00121293	Other
CO	Colombia	Rossioglossum	6	494671	0.00121293	Other
CO	Colombia	Teagueia	6	494671	0.00121293	Other
CO	Colombia	Warreella	6	494671	0.00121293	Other
NO	Norway	Microstylis	1	84098	0.00118909	Other
FR	France	Anacamptorchis	12	1090089	0.00110083	Other
AU	Australia	Cattleya	2	195238	0.00102439	Other
AU	Australia	Crepidium	2	195238	0.00102439	Other
AU	Australia	Eria	2	195238	0.00102439	Other
AU	Australia	Serapias	2	195238	0.00102439	Other
AU	Australia	Thelasis	2	195238	0.00102439	Other
AU	Australia	Vanda	2	195238	0.00102439	Other
CO	Colombia	Aspasia	5	494671	0.00101077	Other
CO	Colombia	Barbosella	5	494671	0.00101077	Other
CO	Colombia	Eriopsis	5	494671	0.00101077	Other
CO	Colombia	Frondaria	5	494671	0.00101077	Other
CO	Colombia	Nemaconia	5	494671	0.00101077	Other
CO	Colombia	Ophidion	5	494671	0.00101077	Other
CO	Colombia	Paphinia	5	494671	0.00101077	Other
CO	Colombia	Psilochilus	5	494671	0.00101077	Other
CO	Colombia	Trevoria	5	494671	0.00101077	Other
CO	Colombia	Beloglottis	4	494671	0.000808618	Other
CO	Colombia	Chondrorhyncha	4	494671	0.000808618	Other
CO	Colombia	Cochleanthes	4	494671	0.000808618	Other
CO	Colombia	Galeottia	4	494671	0.000808618	Other
CO	Colombia	Macradenia	4	494671	0.000808618	Other
CO	Colombia	Madisonia	4	494671	0.000808618	Other
CO	Colombia	Pabstiella	4	494671	0.000808618	Other
DE	Germany	Bletia	1	140149	0.000713526	Other
DE	Germany	Dactylodenia	1	140149	0.000713526	Other
DE	Germany	Pogonia	1	140149	0.000713526	Other
CH	Switzerland	Stelis	1	143131	0.000698661	Other
GB	United Kingdom	Angraecum	1	154382	0.000647744	Other
GB	United Kingdom	Habenaria	1	154382	0.000647744	Other
GB	United Kingdom	Masdevallia	1	154382	0.000647744	Other
GB	United Kingdom	Scaphosepalum	1	154382	0.000647744	Other
GB	United Kingdom	Stelis	1	154382	0.000647744	Other
US	United States	Acanthephippium	1	161921	0.000617585	Other
US	United States	Acriopsis	1	161921	0.000617585	Other
US	United States	Aerangis	1	161921	0.000617585	Other
US	United States	Aeridostachya	1	161921	0.000617585	Other
US	United States	Angulocaste	1	161921	0.000617585	Other
US	United States	Arpophyllum	1	161921	0.000617585	Other
US	United States	Bifrenaria	1	161921	0.000617585	Other
US	United States	Bolusiella	1	161921	0.000617585	Other
US	United States	Brachypeza	1	161921	0.000617585	Other
US	United States	Brassidium	1	161921	0.000617585	Other
US	United States	Coelia	1	161921	0.000617585	Other
US	United States	Colmanara	1	161921	0.000617585	Other
US	United States	Coryanthes	1	161921	0.000617585	Other
US	United States	Cuitlauzina	1	161921	0.000617585	Other
US	United States	Cyrtochilum	1	161921	0.000617585	Other
US	United States	Diaphananthe	1	161921	0.000617585	Other
US	United States	Dienia	1	161921	0.000617585	Other
US	United States	Domingoa	1	161921	0.000617585	Other
US	United States	Dryadella	1	161921	0.000617585	Other
US	United States	Dyakia	1	161921	0.000617585	Other
US	United States	Epilaeliocattleya	1	161921	0.000617585	Other
US	United States	Grosourdya	1	161921	0.000617585	Other
US	United States	Gymnadenia	1	161921	0.000617585	Other
US	United States	Ida	1	161921	0.000617585	Other
US	United States	Isochilus	1	161921	0.000617585	Other
US	United States	Jacquiniella	1	161921	0.000617585	Other
US	United States	Kefersteinia	1	161921	0.000617585	Other
US	United States	Leochilus	1	161921	0.000617585	Other
US	United States	Lepanthopsis	1	161921	0.000617585	Other
US	United States	Luinetia	1	161921	0.000617585	Other
US	United States	Macroclinium	1	161921	0.000617585	Other
US	United States	Mediocalcar	1	161921	0.000617585	Other
US	United States	Meiracyllium	1	161921	0.000617585	Other
US	United States	Microcoelia	1	161921	0.000617585	Other
US	United States	Miltada	1	161921	0.000617585	Other
US	United States	Mycaranthes	1	161921	0.000617585	Other
US	United States	Octomeria	1	161921	0.000617585	Other
US	United States	Odontocidium	1	161921	0.000617585	Other
US	United States	Oncidum	1	161921	0.000617585	Other
US	United States	Opsistylis	1	161921	0.000617585	Other
US	United States	Ornithocephalus	1	161921	0.000617585	Other
US	United States	Peristylus	1	161921	0.000617585	Other
US	United States	Pescatoria	1	161921	0.000617585	Other
US	United States	Prescottia	1	161921	0.000617585	Other
US	United States	Promenaea	1	161921	0.000617585	Other
US	United States	Recchara	1	161921	0.000617585	Other
US	United States	Renancentrum	1	161921	0.000617585	Other
US	United States	Renanthopsis	1	161921	0.000617585	Other
US	United States	Rudolfiella	1	161921	0.000617585	Other
US	United States	Schoenorchis	1	161921	0.000617585	Other
US	United States	Sievekingia	1	161921	0.000617585	Other
US	United States	Smitinandia	1	161921	0.000617585	Other
US	United States	Stenoglottis	1	161921	0.000617585	Other
US	United States	Tetramicra	1	161921	0.000617585	Other
US	United States	Trachoma	1	161921	0.000617585	Other
US	United States	Trichosalpinx	1	161921	0.000617585	Other
US	United States	Trichotosia	1	161921	0.000617585	Other
US	United States	Tropidia	1	161921	0.000617585	Other
US	United States	Tuberolabium	1	161921	0.000617585	Other
US	United States	Xylobium	1	161921	0.000617585	Other
US	United States	Zygostates	1	161921	0.000617585	Other
CO	Colombia	Baskervilla	3	494671	0.000606464	Other
CO	Colombia	Chaubardiella	3	494671	0.000606464	Other
CO	Colombia	Cryptarrhena	3	494671	0.000606464	Other
CO	Colombia	Leochilus	3	494671	0.000606464	Other
CO	Colombia	Macroclinium	3	494671	0.000606464	Other
CO	Colombia	Miltonia	3	494671	0.000606464	Other
CO	Colombia	Myrosmodes	3	494671	0.000606464	Other
CO	Colombia	Oestlundia	3	494671	0.000606464	Other
CO	Colombia	Orleanesia	3	494671	0.000606464	Other
CO	Colombia	Pseudocentrum	3	494671	0.000606464	Other
CO	Colombia	Schlimmia	3	494671	0.000606464	Other
CO	Colombia	Soterosanthus	3	494671	0.000606464	Other
CO	Colombia	Spiranthes	3	494671	0.000606464	Other
AU	Australia	Arundina	1	195238	0.000512195	Other
AU	Australia	Bogoria	1	195238	0.000512195	Other
AU	Australia	Neottia	1	195238	0.000512195	Other
AU	Australia	Prescottia	1	195238	0.000512195	Other
AU	Australia	Prosthechea	1	195238	0.000512195	Other
AU	Australia	Saccolabium	1	195238	0.000512195	Other
AU	Australia	Tuberolabium	1	195238	0.000512195	Other
AU	Australia	Vanilla	1	195238	0.000512195	Other
FR	France	Angraecum	5	1090089	0.000458678	Other
FR	France	Neotinorchis	5	1090089	0.000458678	Other
CO	Colombia	Batemannia	2	494671	0.000404309	Other
CO	Colombia	Brasso-Cattleya	2	494671	0.000404309	Other
CO	Colombia	Brassocattleya	2	494671	0.000404309	Other
CO	Colombia	Chaubardia	2	494671	0.000404309	Other
CO	Colombia	Clowesia	2	494671	0.000404309	Other
CO	Colombia	Coccineorchis	2	494671	0.000404309	Other
CO	Colombia	Corymborkis	2	494671	0.000404309	Other
CO	Colombia	Guanchezia	2	494671	0.000404309	Other
CO	Colombia	Helleriella	2	494671	0.000404309	Other
CO	Colombia	Homalopetalum	2	494671	0.000404309	Other
CO	Colombia	Lycomormium	2	494671	0.000404309	Other
CO	Colombia	Mesadenella	2	494671	0.000404309	Other
CO	Colombia	Monophyllorchis	2	494671	0.000404309	Other
CO	Colombia	Neomoorea	2	494671	0.000404309	Other
CO	Colombia	Odontioda	2	494671	0.000404309	Other
CO	Colombia	Oncidum	2	494671	0.000404309	Other
CO	Colombia	Phalaenopsis	2	494671	0.000404309	Other
CO	Colombia	Ponera	2	494671	0.000404309	Other
CO	Colombia	Sauroglossum	2	494671	0.000404309	Other
CO	Colombia	Vainilla	2	494671	0.000404309	Other
CO	Colombia	Wullschlaegelia	2	494671	0.000404309	Other
FR	France	Ceratandra	4	1090089	0.000366943	Other
FR	France	Dactylanthera	4	1090089	0.000366943	Other
FR	France	Pseudorhiza	4	1090089	0.000366943	Other
FR	France	Acianthera	3	1090089	0.000275207	Other
FR	France	Epidendrum	3	1090089	0.000275207	Other
FR	France	Megastylis	3	1090089	0.000275207	Other
CO	Colombia	Angraecum	1	494671	0.000202155	Other
CO	Colombia	Barkeria	1	494671	0.000202155	Other
CO	Colombia	Brachystele	1	494671	0.000202155	Other
CO	Colombia	Brassidium	1	494671	0.000202155	Other
CO	Colombia	Brassolaeliocattleya	1	494671	0.000202155	Other
CO	Colombia	Cischweinfia	1	494671	0.000202155	Other
CO	Colombia	Coryanthes	1	494671	0.000202155	Other
CO	Colombia	Cybebus	1	494671	0.000202155	Other
CO	Colombia	Echinorhyncha	1	494671	0.000202155	Other
CO	Colombia	Echinosepala	1	494671	0.000202155	Other
CO	Colombia	Epipactis	1	494671	0.000202155	Other
CO	Colombia	Herminium	1	494671	0.000202155	Other
CO	Colombia	Humboldtia	1	494671	0.000202155	Other
CO	Colombia	Isabelia	1	494671	0.000202155	Other
CO	Colombia	Leptotes	1	494671	0.000202155	Other
CO	Colombia	Lueddemannia	1	494671	0.000202155	Other
CO	Colombia	Oeoniella	1	494671	0.000202155	Other
CO	Colombia	Otostylis	1	494671	0.000202155	Other
CO	Colombia	Pendusalpinx	1	494671	0.000202155	Other
CO	Colombia	Plectrophora	1	494671	0.000202155	Other
CO	Colombia	Psychilis	1	494671	0.000202155	Other
CO	Colombia	Psychopsis	1	494671	0.000202155	Other
CO	Colombia	Pterygodium	1	494671	0.000202155	Other
CO	Colombia	Schlimia	1	494671	0.000202155	Other
CO	Colombia	Scuticaria	1	494671	0.000202155	Other
CO	Colombia	Selenipedium	1	494671	0.000202155	Other
CO	Colombia	Sievekingia	1	494671	0.000202155	Other
CO	Colombia	Systeloglossum	1	494671	0.000202155	Other
CO	Colombia	Tetramicra	1	494671	0.000202155	Other
CO	Colombia	Tolumnia	1	494671	0.000202155	Other
CO	Colombia	Trichoglottis	1	494671	0.000202155	Other
CO	Colombia	Trichophila	1	494671	0.000202155	Other
CO	Colombia	Uleiorchis	1	494671	0.000202155	Other
CO	Colombia	Vitekorchis	1	494671	0.000202155	Other
CO	Colombia	Warmingia	1	494671	0.000202155	Other
CO	Colombia	Warreopsis	1	494671	0.000202155	Other
CO	Colombia	Zygostates	1	494671	0.000202155	Other
FR	France	Aspidogyne	2	1090089	0.000183471	Other
FR	France	Beclardia	2	1090089	0.000183471	Other
FR	France	Bulbophyllum	2	1090089	0.000183471	Other
FR	France	Cyclopogon	2	1090089	0.000183471	Other
FR	France	Encyclia	2	1090089	0.000183471	Other
FR	France	Gymnanacamptis	2	1090089	0.000183471	Other
FR	France	Jumellea	2	1090089	0.000183471	Other
FR	France	Disa	1	1090089	9.17356e-05	Other
FR	France	Neotinacamptis	1	1090089	9.17356e-05	Other
FR	France	Orchidactylorhiza	1	1090089	9.17356e-05	Other
