# Supplementary material
Source: Royal Society of Chemistry journal article supplement (doi:10.1039/d6np00027d)

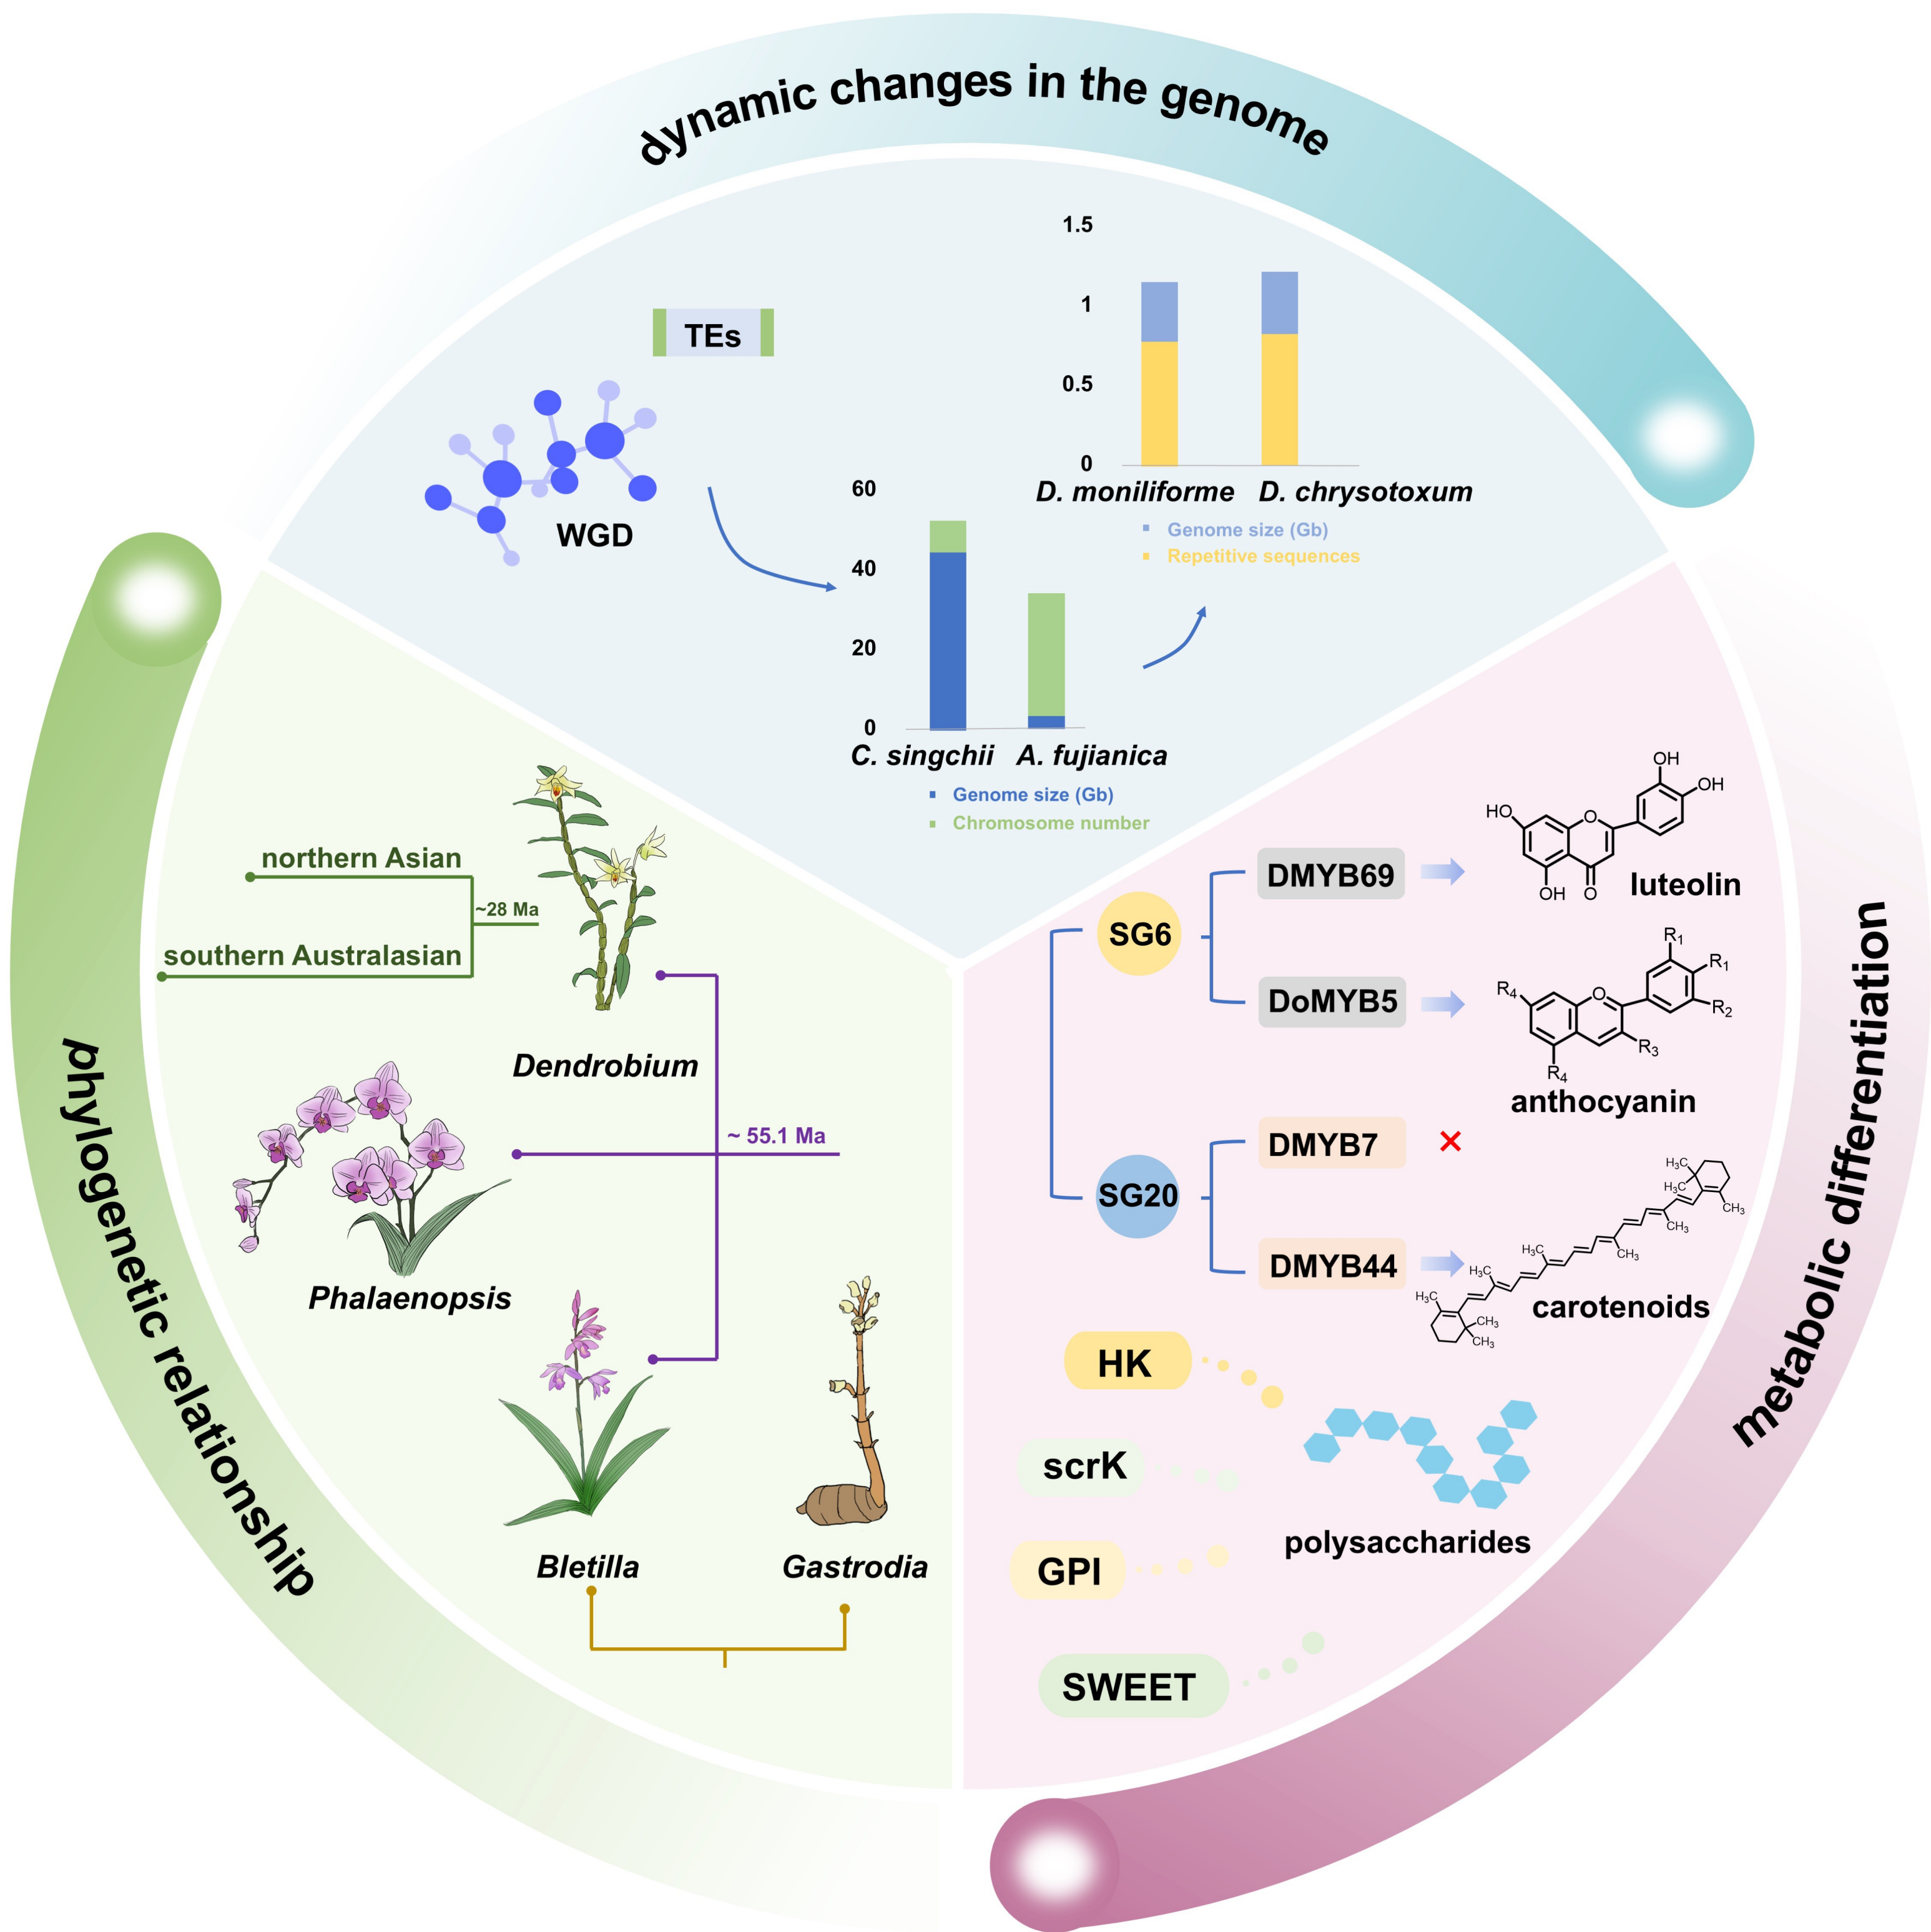

Supplement: d6np00027d1.pdf [file d6np00027d1.pdf]
